# Supplementary material for: Exploring the Molecular Mechanism of Astragali Radix-Curcumae Rhizoma against Gastric Intraepithelial Neoplasia by Network Pharmacology and Molecular Docking
Source: Hindawi journal article supplement (doi:10.1155/2021/8578615), 2021-10-04
Supplement: f1 [file 8578615.f1.pdf]

TABLE 1: The differentially expressed genes of GIN in GSE130823

| Protein name | log2<br>FoldChange | P value  | adjusted P<br>value | change |
|--------------|--------------------|----------|---------------------|--------|
| CHP2         | 5.902967           | 2.92E-08 | 4.29E-06            | up     |
| OLFM4        | 5.227284           | 3.90E-06 | 0.000123            | up     |
| HOXB13       | 4.991963           | 1.57E-10 | 2.88E-07            | up     |
| CPS1         | 4.806236           | 2.20E-07 | 1.62E-05            | up     |
| ADH4         | 4.46519            | 3.49E-07 | 2.19E-05            | up     |
| CDX1         | 4.462033           | 8.46E-09 | 2.09E-06            | up     |
| CLDN3        | 4.423281           | 9.04E-10 | 8.06E-07            | up     |
| REG4         | 4.282192           | 9.50E-08 | 9.18E-06            | up     |
| ANXA13       | 4.254453           | 2.75E-07 | 1.87E-05            | up     |
| HOXA13       | 4.139407           | 1.24E-08 | 2.57E-06            | up     |
| CLDN2        | 4.134212           | 2.50E-09 | 1.17E-06            | up     |
| SERPINB5     | 4.132474           | 2.07E-10 | 2.88E-07            | up     |
| CDH17        | 4.020024           | 1.70E-07 | 1.37E-05            | up     |
| KLK8         | 3.959541           | 3.55E-09 | 1.37E-06            | up     |
| CLRN3        | 3.950696           | 9.43E-09 | 2.25E-06            | up     |
| KLK6         | 3.935545           | 2.19E-09 | 1.17E-06            | up     |
| SLC39A5      | 3.879958           | 6.00E-08 | 6.91E-06            | up     |
| TRIM54       | 3.848517           | 6.86E-10 | 7.09E-07            | up     |
| LEFTY1       | 3.830799           | 8.74E-07 | 4.17E-05            | up     |
| HOXA11-AS1   | 3.759289           | 3.00E-09 | 1.26E-06            | up     |
| XLOC_006390  | 3.688811           | 1.15E-08 | 2.44E-06            | up     |
| KLK7         | 3.674303           | 3.31E-08 | 4.74E-06            | up     |
| CEACAM6      | 3.628526           | 4.68E-08 | 5.94E-06            | up     |
| CXorf61      | 3.574797           | 3.44E-07 | 2.18E-05            | up     |
| GPA33        | 3.55202            | 2.19E-07 | 1.62E-05            | up     |
| CDX2         | 3.55095            | 5.68E-08 | 6.72E-06            | up     |
| HOXA10       | 3.516088           | 1.39E-08 | 2.78E-06            | up     |
| ONECUT2      | 3.500239           | 5.01E-09 | 1.60E-06            | up     |
| GUCY2C       | 3.437024           | 2.29E-08 | 3.64E-06            | up     |
| OTC          | 3.42232            | 2.76E-07 | 1.87E-05            | up     |
| FLJ22763     | 3.416648           | 1.59E-05 | 0.000348            | up     |
| SPINK4       | 3.408739           | 3.16E-05 | 0.000581            | up     |
| XLOC_006025  | 3.401275           | 1.79E-09 | 1.13E-06            | up     |
| MYO7B        | 3.400391           | 4.98E-08 | 6.27E-06            | up     |
| BTNL3        | 3.315126           | 0.000589 | 0.005415            | up     |
| GRIN2D       | 3.311716           | 7.87E-09 | 2.02E-06            | up     |
| MSLN         | 3.305785           | 2.12E-07 | 1.61E-05            | up     |
| XLOC_006277  | 3.295837           | 2.11E-08 | 3.52E-06            | up     |
| MLN          | 3.293822           | 6.89E-05 | 0.00105             | up     |
| CLCA1        | 3.253583           | 0.000119 | 0.001603            | up     |
| PPP1R1B      | 3.240868           | 7.23E-11 | 2.29E-07            | up     |

---

|              |          |          |          |    |
|--------------|----------|----------|----------|----|
| ANPEP        | 3.237321 | 0.000187 | 0.002236 | up |
| TRIM29       | 3.233292 | 1.51E-08 | 2.88E-06 | up |
| VIL1         | 3.21181  | 5.95E-07 | 3.19E-05 | up |
| HOXA11       | 3.208146 | 8.00E-08 | 8.22E-06 | up |
| LOC389332    | 3.184201 | 3.02E-09 | 1.26E-06 | up |
| SI           | 3.160716 | 0.000197 | 0.002323 | up |
| DMBT1        | 3.137306 | 2.35E-05 | 0.000463 | up |
| KRT17        | 3.123753 | 1.92E-07 | 1.50E-05 | up |
| HOXB9        | 3.11173  | 1.13E-06 | 5.01E-05 | up |
| HOTTIP       | 3.109337 | 1.06E-08 | 2.34E-06 | up |
| LOC157860    | 3.078004 | 8.10E-10 | 7.88E-07 | up |
| NOS2         | 3.056294 | 1.68E-06 | 6.73E-05 | up |
| MEP1A        | 2.966576 | 0.00015  | 0.001903 | up |
| CNDP1        | 2.956509 | 4.34E-07 | 2.58E-05 | up |
| XLOC_009934  | 2.949801 | 1.73E-05 | 0.00037  | up |
| PDZK1        | 2.903163 | 1.54E-07 | 1.28E-05 | up |
| GPR128       | 2.89862  | 3.90E-05 | 0.000677 | up |
| MUC17        | 2.890403 | 2.69E-07 | 1.85E-05 | up |
| ZG16         | 2.876243 | 0.000767 | 0.006669 | up |
| TM4SF20      | 2.869049 | 4.34E-06 | 0.000133 | up |
| HOXA9        | 2.816252 | 1.51E-07 | 1.27E-05 | up |
| DEFA6        | 2.805074 | 0.001064 | 0.008616 | up |
| FGFBP1       | 2.766943 | 1.95E-06 | 7.40E-05 | up |
| CDH3         | 2.744336 | 3.07E-07 | 2.01E-05 | up |
| C20orf118    | 2.742095 | 9.44E-07 | 4.40E-05 | up |
| TM4SF4       | 2.724351 | 3.97E-06 | 0.000124 | up |
| F12          | 2.714777 | 1.03E-09 | 8.23E-07 | up |
| SLC3A1       | 2.700479 | 4.47E-06 | 0.000135 | up |
| LRRC19       | 2.692685 | 2.28E-05 | 0.000452 | up |
| LY6D         | 2.692654 | 0.000805 | 0.006936 | up |
| UCA1         | 2.69124  | 2.76E-06 | 9.43E-05 | up |
| LOC100507511 | 2.679005 | 2.51E-09 | 1.17E-06 | up |
| TFF3         | 2.678081 | 6.73E-09 | 1.89E-06 | up |
| SLC17A4      | 2.668691 | 6.63E-06 | 0.00018  | up |
| DPP4         | 2.652453 | 1.64E-08 | 2.99E-06 | up |
| CAMK2N1      | 2.637984 | 1.20E-09 | 8.96E-07 | up |
| RARRES1      | 2.621305 | 3.79E-07 | 2.32E-05 | up |
| CLDN15       | 2.614874 | 3.46E-07 | 2.18E-05 | up |
| CHRNA5       | 2.604248 | 4.05E-09 | 1.45E-06 | up |
| ADORA2B      | 2.580009 | 1.91E-06 | 7.33E-05 | up |
| NEU4         | 2.572029 | 1.18E-07 | 1.07E-05 | up |
| ISX          | 2.571564 | 2.41E-05 | 0.000471 | up |
| CLDN1        | 2.5703   | 7.26E-07 | 3.66E-05 | up |
| PLA2G2A      | 2.557448 | 8.74E-05 | 0.001259 | up |

---

---

|              |          |          |          |    |
|--------------|----------|----------|----------|----|
| ABP1         | 2.539079 | 7.32E-08 | 7.77E-06 | up |
| AGMO         | 2.517833 | 0.000137 | 0.001777 | up |
| CA1          | 2.492693 | 0.000942 | 0.007851 | up |
| CHST6        | 2.489314 | 3.07E-07 | 2.01E-05 | up |
| SLC6A19      | 2.485813 | 6.04E-05 | 0.000947 | up |
| GAST         | 2.483137 | 0.026779 | 0.103157 | up |
| ONECUT3      | 2.471402 | 3.92E-09 | 1.43E-06 | up |
| GCG          | 2.457791 | 0.001623 | 0.011972 | up |
| CCL15        | 2.455748 | 2.44E-07 | 1.73E-05 | up |
| GP2          | 2.438449 | 1.87E-05 | 0.00039  | up |
| XLOC_009021  | 2.43141  | 1.77E-08 | 3.11E-06 | up |
| FOXD1        | 2.426067 | 1.66E-05 | 0.000359 | up |
| DEFA5        | 2.422778 | 0.010724 | 0.051601 | up |
| LOC100288092 | 2.422671 | 3.69E-08 | 5.03E-06 | up |
| NAT2         | 2.417217 | 1.04E-05 | 0.000252 | up |
| CDH16        | 2.416043 | 8.51E-08 | 8.59E-06 | up |
| GJB5         | 2.394721 | 2.42E-06 | 8.59E-05 | up |
| NMUR2        | 2.353981 | 2.52E-08 | 3.90E-06 | up |
| APOA4        | 2.352324 | 0.019229 | 0.080616 | up |
| LOC100507056 | 2.351478 | 2.68E-06 | 9.29E-05 | up |
| MALL         | 2.341713 | 9.22E-06 | 0.000229 | up |
| THBS2        | 2.337974 | 5.06E-08 | 6.31E-06 | up |
| LOC100505839 | 2.333002 | 3.09E-07 | 2.01E-05 | up |
| NMU          | 2.33254  | 5.38E-08 | 6.47E-06 | up |
| MLXIPL       | 2.301372 | 8.54E-08 | 8.59E-06 | up |
| MFSD2A       | 2.292743 | 1.44E-06 | 5.96E-05 | up |
| A1CF         | 2.269594 | 1.34E-06 | 5.69E-05 | up |
| C11orf86     | 2.265592 | 0.000145 | 0.001853 | up |
| ASCL2        | 2.258022 | 4.14E-08 | 5.51E-06 | up |
| SHD          | 2.250606 | 1.15E-07 | 1.05E-05 | up |
| DSG3         | 2.236917 | 3.45E-05 | 0.000619 | up |
| NANOS3       | 2.231927 | 1.76E-06 | 7.00E-05 | up |
| NR1I2        | 2.2289   | 1.54E-07 | 1.28E-05 | up |
| LOC100506219 | 2.221821 | 5.64E-13 | 6.86E-09 | up |
| CEACAM3      | 2.213249 | 7.58E-07 | 3.76E-05 | up |
| LOC100124692 | 2.212013 | 3.05E-07 | 2.01E-05 | up |
| TTLL6        | 2.211426 | 1.58E-07 | 1.30E-05 | up |
| KCNJ3        | 2.201666 | 2.03E-06 | 7.60E-05 | up |
| KIAA1257     | 2.194219 | 3.05E-09 | 1.26E-06 | up |
| MARVELD3     | 2.190204 | 7.18E-08 | 7.68E-06 | up |
| SLC6A7       | 2.16634  | 6.61E-07 | 3.44E-05 | up |
| SLC26A3      | 2.125227 | 0.003692 | 0.022668 | up |
| XLOC_005220  | 2.098529 | 1.50E-10 | 2.88E-07 | up |
| RBP4         | 2.081832 | 3.17E-06 | 0.000105 | up |

---

---

|                |          |          |          |    |
|----------------|----------|----------|----------|----|
| ABCG8          | 2.081098 | 4.73E-05 | 0.000789 | up |
| KLK1           | 2.064512 | 5.31E-08 | 6.43E-06 | up |
| CHST5          | 2.053849 | 2.07E-06 | 7.65E-05 | up |
| MTTP           | 2.04623  | 0.009486 | 0.046977 | up |
| REG1B          | 2.037366 | 0.001013 | 0.008304 | up |
| GJB3           | 2.025351 | 1.56E-07 | 1.29E-05 | up |
| OVOL1          | 2.025147 | 4.55E-07 | 2.68E-05 | up |
| INSM1          | 2.0214   | 2.71E-06 | 9.32E-05 | up |
| AGMAT          | 2.020558 | 3.16E-07 | 2.04E-05 | up |
| C19orf45       | 2.016888 | 1.90E-10 | 2.88E-07 | up |
| PRAP1          | 2.015414 | 1.74E-05 | 0.000371 | up |
| MLK7-AS1       | 2.00665  | 1.85E-06 | 7.23E-05 | up |
| CFTR           | 2.004008 | 1.46E-06 | 6.03E-05 | up |
| PCK1           | 2.000699 | 0.001532 | 0.011453 | up |
| ANXA9          | 1.99741  | 1.57E-07 | 1.30E-05 | up |
| PPP1R14D       | 1.989161 | 6.16E-06 | 0.00017  | up |
| XLOC_l2_006021 | 1.987217 | 1.53E-05 | 0.000338 | up |
| FLJ26086       | 1.984047 | 2.26E-05 | 0.000449 | up |
| JPH1           | 1.979048 | 6.10E-08 | 6.91E-06 | up |
| PPP1R14C       | 1.959387 | 1.47E-06 | 6.08E-05 | up |
| FUT5           | 1.952768 | 5.28E-08 | 6.43E-06 | up |
| XLOC_014103    | 1.94998  | 1.20E-06 | 5.22E-05 | up |
| LOC100505908   | 1.947798 | 1.03E-08 | 2.31E-06 | up |
| TIMP4          | 1.947428 | 3.67E-09 | 1.40E-06 | up |
| AFAP1-AS1      | 1.94618  | 0.000382 | 0.003878 | up |
| S100A2         | 1.940886 | 4.06E-08 | 5.42E-06 | up |
| TNFSF9         | 1.937688 | 2.27E-06 | 8.22E-05 | up |
| WISP3          | 1.937577 | 7.20E-05 | 0.001086 | up |
| TNNC2          | 1.936126 | 6.49E-07 | 3.41E-05 | up |
| GAL            | 1.927642 | 0.001437 | 0.0109   | up |
| HOTAIR         | 1.92246  | 2.60E-07 | 1.81E-05 | up |
| TNFRSF11A      | 1.921    | 1.25E-06 | 5.40E-05 | up |
| EPHB2          | 1.918209 | 5.31E-08 | 6.43E-06 | up |
| KRT42P         | 1.908256 | 1.35E-06 | 5.71E-05 | up |
| CCND2          | 1.905744 | 1.98E-06 | 7.45E-05 | up |
| LOC100506995   | 1.904624 | 5.69E-06 | 0.000161 | up |
| CD55           | 1.904434 | 1.52E-06 | 6.22E-05 | up |
| PRR4           | 1.901341 | 0.000181 | 0.002185 | up |
| NOX1           | 1.900521 | 5.50E-07 | 3.03E-05 | up |
| XLOC_007054    | 1.884718 | 2.65E-08 | 4.05E-06 | up |
| NTS            | 1.878419 | 7.01E-05 | 0.001063 | up |
| CNTNAP2        | 1.873576 | 3.66E-08 | 5.03E-06 | up |
| PCSK5          | 1.871376 | 1.66E-05 | 0.00036  | up |
| C2orf82        | 1.864342 | 1.09E-08 | 2.38E-06 | up |

---

---

|                |          |          |          |    |
|----------------|----------|----------|----------|----|
| FAM84A         | 1.852385 | 1.00E-08 | 2.29E-06 | up |
| SULT2B1        | 1.851737 | 4.63E-08 | 5.90E-06 | up |
| TEX11          | 1.84904  | 2.78E-07 | 1.88E-05 | up |
| ATP2C2         | 1.845756 | 7.65E-10 | 7.67E-07 | up |
| UPP1           | 1.845195 | 5.40E-07 | 3.00E-05 | up |
| XLOC_014161    | 1.839974 | 4.23E-12 | 2.26E-08 | up |
| ABHD11-AS1     | 1.835378 | 9.81E-07 | 4.50E-05 | up |
| EPHX4          | 1.834373 | 2.56E-05 | 0.000494 | up |
| ANKS4B         | 1.833669 | 2.18E-07 | 1.62E-05 | up |
| TNFRSF12A      | 1.83355  | 2.31E-07 | 1.68E-05 | up |
| PI3            | 1.833393 | 0.008301 | 0.042468 | up |
| HES2           | 1.827105 | 6.64E-06 | 0.00018  | up |
| FOSB           | 1.826541 | 0.000318 | 0.003371 | up |
| KRT80          | 1.825608 | 4.63E-05 | 0.000774 | up |
| DHRS9          | 1.822067 | 2.95E-05 | 0.00055  | up |
| XLOC_000642    | 1.820716 | 5.09E-09 | 1.60E-06 | up |
| ABCG5          | 1.816457 | 0.000166 | 0.002047 | up |
| ZNF703         | 1.809515 | 1.53E-08 | 2.90E-06 | up |
| BTBD17         | 1.805966 | 7.55E-07 | 3.76E-05 | up |
| MMP3           | 1.804606 | 0.001352 | 0.010413 | up |
| C17orf78       | 1.799268 | 0.008476 | 0.043141 | up |
| KRT16P2        | 1.796608 | 1.36E-05 | 0.000309 | up |
| CCL25          | 1.794314 | 0.007879 | 0.040843 | up |
| LIF            | 1.794058 | 3.59E-08 | 5.03E-06 | up |
| TPPP3          | 1.790669 | 1.67E-07 | 1.35E-05 | up |
| FAM81A         | 1.788799 | 1.60E-07 | 1.31E-05 | up |
| FAM25A         | 1.788118 | 0.00013  | 0.001704 | up |
| ITFG3          | 1.787497 | 0.000185 | 0.002214 | up |
| GBA3           | 1.787134 | 0.016459 | 0.071723 | up |
| SLC5A1         | 1.782074 | 1.70E-05 | 0.000366 | up |
| LOC201651      | 1.781607 | 8.52E-06 | 0.000216 | up |
| TFPI2          | 1.771952 | 1.83E-05 | 0.000384 | up |
| C2orf89        | 1.767571 | 1.68E-05 | 0.000363 | up |
| APOC3          | 1.767057 | 0.021661 | 0.088209 | up |
| XLOC_12_005553 | 1.765079 | 3.36E-07 | 2.15E-05 | up |
| IGFL2          | 1.754927 | 0.000152 | 0.001918 | up |
| CALHM3         | 1.75147  | 0.00039  | 0.003943 | up |
| XLOC_12_009947 | 1.750739 | 1.18E-05 | 0.000277 | up |
| ZNF488         | 1.749951 | 5.41E-06 | 0.000156 | up |
| FOLH1B         | 1.744845 | 0.001806 | 0.013042 | up |
| TMEM150B       | 1.744227 | 1.53E-07 | 1.28E-05 | up |
| XDH            | 1.740048 | 0.000344 | 0.003576 | up |
| SLC27A2        | 1.737823 | 6.42E-08 | 7.12E-06 | up |
| XLOC_005777    | 1.737647 | 5.03E-05 | 0.000826 | up |

---

---

|              |          |          |          |    |
|--------------|----------|----------|----------|----|
| XLOC_006948  | 1.737357 | 1.01E-07 | 9.58E-06 | up |
| BHLHE41      | 1.731726 | 5.88E-09 | 1.75E-06 | up |
| HOXB5        | 1.72908  | 7.22E-07 | 3.64E-05 | up |
| SLC7A9       | 1.725497 | 0.007874 | 0.040831 | up |
| LOC100505535 | 1.721428 | 6.05E-07 | 3.24E-05 | up |
| MMP7         | 1.718529 | 0.007593 | 0.039705 | up |
| CRABP2       | 1.712502 | 2.78E-05 | 0.000529 | up |
| ANXA1        | 1.712011 | 1.09E-06 | 4.87E-05 | up |
| SYNPR        | 1.710974 | 4.36E-05 | 0.000738 | up |
| 3-Mar        | 1.705935 | 3.23E-09 | 1.29E-06 | up |
| RAB3B        | 1.695897 | 5.81E-05 | 0.000921 | up |
| POLR3G       | 1.693546 | 4.33E-06 | 0.000133 | up |
| KLK12        | 1.688947 | 0.000567 | 0.005257 | up |
| SLC6A14      | 1.68735  | 0.002367 | 0.016084 | up |
| KCNH6        | 1.684382 | 1.86E-08 | 3.21E-06 | up |
| FABP6        | 1.680514 | 0.000144 | 0.001848 | up |
| TNFRSF11B    | 1.679811 | 7.13E-06 | 0.000189 | up |
| CYP3A4       | 1.671232 | 0.000851 | 0.007233 | up |
| PRAC         | 1.670518 | 0.000665 | 0.005972 | up |
| FLJ45248     | 1.670104 | 1.90E-07 | 1.48E-05 | up |
| TBX3         | 1.66964  | 6.02E-07 | 3.23E-05 | up |
| CDHR5        | 1.666696 | 5.03E-06 | 0.000148 | up |
| FOXJ1        | 1.665203 | 6.42E-05 | 0.000992 | up |
| LOC254057    | 1.660486 | 0.000291 | 0.003136 | up |
| XLOC_011893  | 1.652545 | 8.66E-10 | 7.94E-07 | up |
| KLK10        | 1.651809 | 4.93E-06 | 0.000146 | up |
| C14orf176    | 1.644736 | 4.57E-05 | 0.000765 | up |
| CEACAM5      | 1.631689 | 0.000111 | 0.001519 | up |
| PNMT         | 1.630663 | 1.67E-08 | 3.03E-06 | up |
| XLOC_011858  | 1.629432 | 1.92E-06 | 7.37E-05 | up |
| TRIM15       | 1.629113 | 2.01E-05 | 0.000412 | up |
| LINC00346    | 1.626582 | 3.16E-08 | 4.57E-06 | up |
| SLC22A18AS   | 1.625645 | 3.13E-07 | 2.03E-05 | up |
| TRPM2        | 1.622704 | 2.67E-07 | 1.84E-05 | up |
| XLOC_000822  | 1.618246 | 3.87E-07 | 2.35E-05 | up |
| XLOC_012981  | 1.614681 | 8.71E-06 | 0.00022  | up |
| MSX1         | 1.613899 | 5.28E-06 | 0.000153 | up |
| IYD          | 1.613394 | 7.60E-09 | 1.99E-06 | up |
| WBSCR27      | 1.611348 | 0.000749 | 0.00654  | up |
| PPBP         | 1.611057 | 0.000186 | 0.002226 | up |
| CRIP3        | 1.608697 | 7.64E-05 | 0.001139 | up |
| ADRA2A       | 1.604589 | 0.000112 | 0.001536 | up |
| GPRC5A       | 1.597215 | 1.76E-06 | 7.00E-05 | up |
| TTC9B        | 1.591586 | 1.51E-05 | 0.000335 | up |

---

---

|                |          |          |          |    |
|----------------|----------|----------|----------|----|
| C19orf21       | 1.588836 | 6.54E-07 | 3.43E-05 | up |
| HIST3H2A       | 1.587734 | 2.53E-06 | 8.88E-05 | up |
| FAR2           | 1.581724 | 1.17E-05 | 0.000276 | up |
| DNAH2          | 1.578425 | 1.78E-05 | 0.000377 | up |
| XLOC_12_010149 | 1.574914 | 1.42E-06 | 5.91E-05 | up |
| FEV            | 1.571827 | 7.11E-06 | 0.000189 | up |
| LOC100507218   | 1.571811 | 0.000103 | 0.001433 | up |
| PADI2          | 1.568478 | 7.92E-06 | 0.000205 | up |
| MS4A15         | 1.568208 | 0.000106 | 0.001463 | up |
| CIB2           | 1.567026 | 7.50E-07 | 3.74E-05 | up |
| BTBD16         | 1.565792 | 0.000874 | 0.00737  | up |
| SHISA3         | 1.563603 | 0.000784 | 0.006805 | up |
| NKX6-3         | 1.562514 | 8.38E-05 | 0.001217 | up |
| CCL18          | 1.557768 | 0.026874 | 0.103401 | up |
| SLC16A2        | 1.553355 | 9.53E-08 | 9.18E-06 | up |
| XLOC_12_001134 | 1.549668 | 9.91E-06 | 0.000242 | up |
| TNS4           | 1.548133 | 0.00032  | 0.003384 | up |
| ETV4           | 1.545884 | 1.99E-06 | 7.48E-05 | up |
| PCSK9          | 1.544743 | 0.00402  | 0.024237 | up |
| UBXN10         | 1.543238 | 4.10E-10 | 5.06E-07 | up |
| WNT11          | 1.539219 | 1.30E-06 | 5.55E-05 | up |
| XLOC_003528    | 1.538096 | 0.000457 | 0.004438 | up |
| CITED1         | 1.533117 | 7.08E-07 | 3.59E-05 | up |
| TPRXL          | 1.532594 | 2.93E-05 | 0.000547 | up |
| KIAA1199       | 1.531043 | 0.000333 | 0.003484 | up |
| BANK1          | 1.529704 | 0.000139 | 0.001801 | up |
| AREG           | 1.529032 | 5.05E-06 | 0.000148 | up |
| NR5A2          | 1.525026 | 0.000168 | 0.00206  | up |
| GCNT3          | 1.522767 | 7.85E-05 | 0.001162 | up |
| NXF3           | 1.521258 | 2.60E-05 | 0.000501 | up |
| GLB1L2         | 1.519342 | 2.21E-08 | 3.58E-06 | up |
| STK31          | 1.516212 | 1.07E-06 | 4.84E-05 | up |
| MEST           | 1.515007 | 8.90E-11 | 2.29E-07 | up |
| TINAG          | 1.514196 | 0.00012  | 0.001618 | up |
| C20orf85       | 1.511561 | 0.001272 | 0.009919 | up |
| CLDN7          | 1.510021 | 7.95E-06 | 0.000205 | up |
| XLOC_007123    | 1.501849 | 0.000208 | 0.002415 | up |
| LDLRAD1        | 1.501766 | 5.20E-07 | 2.94E-05 | up |
| CTSL2          | 1.501311 | 2.28E-09 | 1.17E-06 | up |
| GUCA2A         | 1.499255 | 0.002977 | 0.019217 | up |
| GUCY1B2        | 1.493444 | 2.61E-05 | 0.000503 | up |
| LOC100506591   | 1.493116 | 0.000206 | 0.002396 | up |
| METTL7B        | 1.48905  | 1.51E-06 | 6.19E-05 | up |
| PF4            | 1.487426 | 0.000302 | 0.003235 | up |

---

---

|              |          |          |          |    |
|--------------|----------|----------|----------|----|
| S100A10      | 1.48369  | 2.11E-06 | 7.75E-05 | up |
| XLOC_003441  | 1.48342  | 3.02E-08 | 4.41E-06 | up |
| HP           | 1.481206 | 4.25E-06 | 0.000131 | up |
| XLOC_000095  | 1.481162 | 1.67E-07 | 1.35E-05 | up |
| TUBB3        | 1.477069 | 7.41E-05 | 0.001111 | up |
| ARL9         | 1.476482 | 3.45E-05 | 0.000618 | up |
| PHLDA2       | 1.472741 | 5.12E-08 | 6.31E-06 | up |
| DACH1        | 1.471617 | 1.57E-05 | 0.000344 | up |
| NOXO1        | 1.471501 | 1.36E-06 | 5.74E-05 | up |
| SEMG1        | 1.468253 | 0.000233 | 0.00264  | up |
| KBTBD11      | 1.467548 | 5.73E-06 | 0.000162 | up |
| XLOC_000371  | 1.467422 | 0.002033 | 0.014276 | up |
| CCK          | 1.46408  | 0.00184  | 0.013229 | up |
| C1orf110     | 1.463335 | 0.000252 | 0.002807 | up |
| FOXD2        | 1.462607 | 1.81E-08 | 3.13E-06 | up |
| BEST4        | 1.459577 | 0.003355 | 0.021059 | up |
| HTR2B        | 1.458794 | 0.000259 | 0.002867 | up |
| CXXC4        | 1.457637 | 7.41E-08 | 7.82E-06 | up |
| DAPL1        | 1.456667 | 1.49E-05 | 0.000331 | up |
| ULBP2        | 1.45457  | 4.52E-06 | 0.000136 | up |
| TMPRSS15     | 1.453955 | 0.044517 | 0.150998 | up |
| PDE3B        | 1.453585 | 1.98E-07 | 1.53E-05 | up |
| C6orf97      | 1.451994 | 6.67E-06 | 0.00018  | up |
| MS4A10       | 1.450186 | 0.032208 | 0.118427 | up |
| GPR37L1      | 1.449708 | 7.03E-06 | 0.000187 | up |
| KRT7         | 1.449367 | 7.08E-07 | 3.59E-05 | up |
| AQP2         | 1.447768 | 0.000127 | 0.001677 | up |
| OSTalpha     | 1.447496 | 0.026504 | 0.102307 | up |
| LOC100505882 | 1.446474 | 2.52E-06 | 8.84E-05 | up |
| GLTPD2       | 1.446179 | 2.91E-05 | 0.000544 | up |
| HENMT1       | 1.445751 | 4.41E-09 | 1.52E-06 | up |
| TPPP         | 1.445247 | 1.89E-06 | 7.31E-05 | up |
| ITGB8        | 1.44495  | 8.75E-09 | 2.14E-06 | up |
| HSD11B2      | 1.441826 | 2.19E-09 | 1.17E-06 | up |
| LOC100505592 | 1.441434 | 5.69E-05 | 0.000907 | up |
| XLOC_005540  | 1.437539 | 7.37E-07 | 3.69E-05 | up |
| RNF186       | 1.437419 | 0.000522 | 0.004926 | up |
| LRP8         | 1.436786 | 0.000286 | 0.003094 | up |
| FABP2        | 1.435683 | 0.005521 | 0.030915 | up |
| FUT3         | 1.435452 | 2.40E-06 | 8.56E-05 | up |
| LOC439990    | 1.42904  | 3.64E-07 | 2.27E-05 | up |
| C21orf90     | 1.428113 | 0.001382 | 0.010581 | up |
| MMP12        | 1.42743  | 0.029477 | 0.110694 | up |
| CYP4F2       | 1.426325 | 0.00679  | 0.036395 | up |

---



---

|              |          |          |          |    |
|--------------|----------|----------|----------|----|
| SNAR-A3      | 1.425288 | 0.000188 | 0.002241 | up |
| HIST1H2AI    | 1.424063 | 8.16E-06 | 0.000209 | up |
| ACE2         | 1.423737 | 0.004022 | 0.024237 | up |
| OTOP3        | 1.422547 | 0.002122 | 0.01477  | up |
| SMPX         | 1.420227 | 2.04E-05 | 0.000416 | up |
| CRYBA2       | 1.419201 | 6.43E-07 | 3.40E-05 | up |
| DRD2         | 1.418903 | 2.85E-07 | 1.91E-05 | up |
| CD9          | 1.415369 | 9.50E-08 | 9.18E-06 | up |
| NPNT         | 1.410604 | 4.65E-06 | 0.000139 | up |
| MDFI         | 1.409329 | 4.23E-05 | 0.00072  | up |
| UNC93A       | 1.407646 | 9.31E-05 | 0.001324 | up |
| APOBEC1      | 1.407533 | 0.002183 | 0.015091 | up |
| HPR          | 1.406461 | 7.25E-05 | 0.001091 | up |
| PAX9         | 1.404133 | 9.70E-05 | 0.001366 | up |
| ZP3          | 1.403601 | 6.01E-06 | 0.000167 | up |
| SIPA1L2      | 1.40314  | 2.06E-06 | 7.65E-05 | up |
| DNAJC12      | 1.401753 | 1.02E-08 | 2.29E-06 | up |
| SATB2        | 1.400351 | 1.33E-06 | 5.65E-05 | up |
| KLK3         | 1.39994  | 0.000121 | 0.001625 | up |
| ITLN1        | 1.398985 | 0.028017 | 0.106431 | up |
| LOC170425    | 1.39792  | 4.93E-06 | 0.000146 | up |
| PRSS3        | 1.396961 | 2.60E-06 | 9.06E-05 | up |
| HOXB6        | 1.396447 | 0.00013  | 0.001705 | up |
| HOXB7        | 1.394688 | 3.86E-06 | 0.000122 | up |
| MESP1        | 1.389641 | 0.004747 | 0.027521 | up |
| MUC13        | 1.383498 | 0.000539 | 0.005041 | up |
| B3GNT8       | 1.383498 | 6.11E-07 | 3.25E-05 | up |
| HSPA4L       | 1.38265  | 7.74E-05 | 0.001151 | up |
| MUC2         | 1.380377 | 0.004364 | 0.025809 | up |
| SLC35D3      | 1.376628 | 5.61E-06 | 0.000159 | up |
| AIFM3        | 1.375639 | 3.58E-07 | 2.24E-05 | up |
| SLC4A7       | 1.374412 | 0.000149 | 0.001896 | up |
| PFKFB4       | 1.371912 | 5.38E-06 | 0.000155 | up |
| OR51E1       | 1.37114  | 8.11E-05 | 0.001194 | up |
| C10orf125    | 1.370611 | 9.92E-07 | 4.54E-05 | up |
| LOC100129931 | 1.365906 | 3.12E-05 | 0.000576 | up |
| LOC284865    | 1.365893 | 0.000723 | 0.006359 | up |
| LOC100133311 | 1.36574  | 6.51E-06 | 0.000178 | up |
| SNORA74A     | 1.365637 | 0.000181 | 0.002182 | up |
| CRYM         | 1.362587 | 2.43E-07 | 1.73E-05 | up |
| ABCC2        | 1.362306 | 0.002341 | 0.015974 | up |
| XLOC_005749  | 1.357892 | 2.46E-06 | 8.72E-05 | up |
| XLOC_000348  | 1.35394  | 1.93E-06 | 7.37E-05 | up |
| C10orf81     | 1.353202 | 1.76E-06 | 7.00E-05 | up |

---

---

|                |          |          |          |    |
|----------------|----------|----------|----------|----|
| SNAR-H         | 1.339955 | 0.000201 | 0.002355 | up |
| NEUROD2        | 1.339429 | 0.000912 | 0.007632 | up |
| MLIP           | 1.339362 | 0.000329 | 0.003462 | up |
| PCDHB9         | 1.337358 | 3.89E-05 | 0.000675 | up |
| XLOC_12_010056 | 1.335785 | 6.57E-06 | 0.000179 | up |
| XLOC_12_005814 | 1.334971 | 1.49E-05 | 0.000331 | up |
| LOC100190940   | 1.331275 | 3.01E-06 | 0.000101 | up |
| SPAG17         | 1.330809 | 0.003232 | 0.020456 | up |
| CDSN           | 1.328778 | 8.06E-05 | 0.001189 | up |
| BAIAP2L2       | 1.328314 | 0.000198 | 0.00233  | up |
| DPEP1          | 1.325917 | 0.028642 | 0.108266 | up |
| RRM2           | 1.325131 | 0.000444 | 0.004349 | up |
| LGR5           | 1.322958 | 2.89E-05 | 0.000542 | up |
| RAD51AP1       | 1.321439 | 4.39E-05 | 0.000742 | up |
| LYPD5          | 1.320305 | 6.13E-05 | 0.000958 | up |
| SP6            | 1.320079 | 2.79E-06 | 9.51E-05 | up |
| TUBAL3         | 1.318096 | 0.002947 | 0.019075 | up |
| CASP14L        | 1.317237 | 0.003703 | 0.022708 | up |
| CREB3L3        | 1.316176 | 0.006357 | 0.03451  | up |
| EPPK1          | 1.315071 | 2.21E-06 | 8.04E-05 | up |
| HSD17B11       | 1.312542 | 4.99E-07 | 2.86E-05 | up |
| AGR3           | 1.311365 | 1.28E-07 | 1.12E-05 | up |
| ITLN2          | 1.308596 | 0.032615 | 0.119579 | up |
| MFI2           | 1.308337 | 1.03E-05 | 0.000249 | up |
| C6orf208       | 1.30668  | 1.27E-06 | 5.45E-05 | up |
| NUP62CL        | 1.306516 | 1.94E-06 | 7.40E-05 | up |
| F5             | 1.306156 | 0.000899 | 0.00754  | up |
| DEPDC1B        | 1.302553 | 6.00E-05 | 0.000942 | up |
| MACC1          | 1.300405 | 1.65E-07 | 1.34E-05 | up |
| CDA            | 1.299433 | 0.000686 | 0.006121 | up |
| S100A3         | 1.298853 | 0.00045  | 0.004384 | up |
| KIAA1211       | 1.296637 | 0.000107 | 0.001475 | up |
| ARHGEF38       | 1.295017 | 6.14E-08 | 6.91E-06 | up |
| PTPRVP         | 1.2945   | 0.003027 | 0.019454 | up |
| RCOR2          | 1.294114 | 5.22E-09 | 1.62E-06 | up |
| ETS2           | 1.29273  | 2.29E-08 | 3.64E-06 | up |
| HTR1D          | 1.292704 | 2.39E-05 | 0.000469 | up |
| CELSR3         | 1.289163 | 2.68E-06 | 9.28E-05 | up |
| FABP1          | 1.288601 | 0.013214 | 0.060547 | up |
| LOC100507235   | 1.287655 | 4.96E-06 | 0.000146 | up |
| DHFR           | 1.287615 | 2.14E-07 | 1.61E-05 | up |
| ACTL8          | 1.287365 | 0.000607 | 0.005554 | up |
| SNAR-D         | 1.286848 | 0.000403 | 0.004038 | up |
| XPNPEP2        | 1.28556  | 0.000867 | 0.007321 | up |

---

---

|                |          |          |          |    |
|----------------|----------|----------|----------|----|
| PRR19          | 1.285082 | 1.28E-08 | 2.64E-06 | up |
| CALML4         | 1.284737 | 2.06E-06 | 7.65E-05 | up |
| SNAR-G2        | 1.283926 | 0.00046  | 0.004462 | up |
| XLOC_l2_007986 | 1.283471 | 0.000384 | 0.003894 | up |
| PYDC1          | 1.28318  | 6.19E-06 | 0.000171 | up |
| SH3BP4         | 1.27952  | 1.33E-09 | 9.69E-07 | up |
| LRR1Q4         | 1.279331 | 4.38E-05 | 0.00074  | up |
| MGC12982       | 1.276727 | 2.91E-07 | 1.94E-05 | up |
| TLX1           | 1.276552 | 3.39E-07 | 2.16E-05 | up |
| XLOC_005341    | 1.276225 | 0.007079 | 0.037567 | up |
| AFAP1L2        | 1.275236 | 1.98E-06 | 7.45E-05 | up |
| MYOM3          | 1.274445 | 3.17E-05 | 0.000582 | up |
| ANXA2P3        | 1.270675 | 5.09E-05 | 0.000835 | up |
| XLOC_002921    | 1.269621 | 1.11E-06 | 4.93E-05 | up |
| XLOC_l2_006745 | 1.268796 | 8.05E-06 | 0.000207 | up |
| CYP1A1         | 1.267997 | 0.005011 | 0.028685 | up |
| XLOC_001341    | 1.265884 | 8.26E-05 | 0.001207 | up |
| FAM64A         | 1.265584 | 4.11E-05 | 0.000706 | up |
| LOC93432       | 1.264064 | 1.42E-05 | 0.000319 | up |
| KRT6B          | 1.263704 | 0.020106 | 0.083396 | up |
| CEACAM7        | 1.260476 | 0.000321 | 0.003394 | up |
| OR7E5P         | 1.260424 | 5.27E-05 | 0.000856 | up |
| LRRC6          | 1.257069 | 8.73E-07 | 4.17E-05 | up |
| HKDC1          | 1.255298 | 4.86E-05 | 0.000806 | up |
| ITPK1          | 1.254585 | 3.83E-06 | 0.000121 | up |
| CEACAM1        | 1.252966 | 0.00015  | 0.001899 | up |
| MYO15B         | 1.249643 | 2.85E-05 | 0.000538 | up |
| LOC100507507   | 1.247935 | 3.13E-09 | 1.27E-06 | up |
| LOC648987      | 1.246861 | 2.10E-06 | 7.73E-05 | up |
| CTTNBP2        | 1.245904 | 5.88E-05 | 0.000929 | up |
| C1orf135       | 1.24442  | 5.17E-05 | 0.000844 | up |
| SKAP2          | 1.243282 | 7.38E-09 | 1.99E-06 | up |
| TMC7           | 1.242899 | 7.64E-06 | 0.000199 | up |
| SKA1           | 1.242619 | 0.000158 | 0.001976 | up |
| CENPA          | 1.241323 | 0.000203 | 0.002375 | up |
| EGR4           | 1.239898 | 6.65E-06 | 0.00018  | up |
| INSL5          | 1.237019 | 0.000996 | 0.008185 | up |
| ETHE1          | 1.234881 | 8.05E-07 | 3.93E-05 | up |
| XLOC_l2_015800 | 1.231556 | 0.008937 | 0.044926 | up |
| MEP1B          | 1.230226 | 0.037193 | 0.132311 | up |
| C3orf32        | 1.229688 | 0.001188 | 0.009418 | up |
| LOC389641      | 1.229391 | 3.41E-07 | 2.17E-05 | up |
| SKP2           | 1.223535 | 1.26E-07 | 1.12E-05 | up |
| CST1           | 1.222913 | 1.06E-05 | 0.000256 | up |

---

---

|                     |          |          |          |    |
|---------------------|----------|----------|----------|----|
| GPD1                | 1.222563 | 0.000414 | 0.004127 | up |
| GJB2                | 1.219959 | 1.60E-05 | 0.00035  | up |
| ANLN                | 1.217399 | 0.000321 | 0.003394 | up |
| XLOC_002870         | 1.21226  | 0.000368 | 0.003774 | up |
| TMEM45B             | 1.212124 | 3.04E-07 | 2.01E-05 | up |
| CDHR4               | 1.211703 | 0.000333 | 0.003484 | up |
| KIF13A              | 1.210303 | 9.56E-06 | 0.000236 | up |
| KRT15               | 1.209533 | 2.56E-07 | 1.78E-05 | up |
| LOC284570           | 1.208332 | 6.07E-06 | 0.000169 | up |
| FOXC1               | 1.207511 | 6.21E-05 | 0.000968 | up |
| ODZ2                | 1.205905 | 6.92E-05 | 0.001053 | up |
| LOC100287482        | 1.204302 | 3.38E-05 | 0.00061  | up |
| LOC100505644        | 1.203251 | 2.77E-06 | 9.45E-05 | up |
| LOC401127           | 1.203119 | 3.75E-07 | 2.31E-05 | up |
| NEB                 | 1.202715 | 0.000386 | 0.003913 | up |
| PHOSPHO2-<br>KLHL23 | 1.202069 | 9.85E-05 | 0.001385 | up |
| XLOC_006544         | 1.200701 | 1.58E-08 | 2.93E-06 | up |
| VGF                 | 1.197867 | 0.004658 | 0.027099 | up |
| C18orf56            | 1.196397 | 1.58E-05 | 0.000346 | up |
| ASS1                | 1.195619 | 1.06E-05 | 0.000256 | up |
| ABHD11              | 1.194861 | 4.36E-08 | 5.66E-06 | up |
| MNS1                | 1.194754 | 0.000163 | 0.002019 | up |
| SNAR-B2             | 1.194278 | 0.000995 | 0.008182 | up |
| ANXA2               | 1.19299  | 7.11E-05 | 0.001074 | up |
| GDA                 | 1.190203 | 3.12E-05 | 0.000577 | up |
| EDN3                | 1.19009  | 9.53E-06 | 0.000235 | up |
| XLOC_006705         | 1.187874 | 3.95E-05 | 0.000685 | up |
| XLOC_012170         | 1.187026 | 2.75E-07 | 1.87E-05 | up |
| SLC7A4              | 1.18694  | 0.001362 | 0.01047  | up |
| TNNC1               | 1.186188 | 0.002398 | 0.01626  | up |
| MS4A8B              | 1.183968 | 2.77E-05 | 0.000527 | up |
| LOC285419           | 1.183205 | 0.000104 | 0.001442 | up |
| XLOC_000855         | 1.182012 | 5.65E-06 | 0.00016  | up |
| EPHB1               | 1.181156 | 5.02E-06 | 0.000148 | up |
| LOC100505727        | 1.180853 | 0.000219 | 0.002507 | up |
| XLOC_008005         | 1.179488 | 0.000102 | 0.001425 | up |
| CES2                | 1.178783 | 4.16E-05 | 0.000713 | up |
| RIMKLA              | 1.178051 | 1.57E-05 | 0.000344 | up |
| GRB14               | 1.177615 | 0.000205 | 0.002382 | up |
| CDKN3               | 1.177073 | 3.43E-05 | 0.000618 | up |
| BST1                | 1.176709 | 0.000563 | 0.005238 | up |
| KCNH8               | 1.174498 | 4.36E-07 | 2.59E-05 | up |
| C11orf80            | 1.174364 | 4.52E-06 | 0.000136 | up |

---

---

|                |          |          |          |    |
|----------------|----------|----------|----------|----|
| XLOC_003245    | 1.173682 | 0.00017  | 0.002083 | up |
| LOC388242      | 1.172984 | 6.75E-05 | 0.001033 | up |
| SKA3           | 1.171853 | 4.92E-05 | 0.000812 | up |
| C2CD4A         | 1.170766 | 0.001132 | 0.009056 | up |
| C12orf28       | 1.170759 | 0.000633 | 0.005745 | up |
| REEP6          | 1.169646 | 8.07E-06 | 0.000207 | up |
| IRAK2          | 1.168946 | 3.13E-05 | 0.000578 | up |
| GALNT8         | 1.168197 | 0.001122 | 0.008991 | up |
| KLHL13         | 1.167455 | 0.000455 | 0.004418 | up |
| SPC25          | 1.165473 | 0.000423 | 0.004197 | up |
| ENTPD2         | 1.163585 | 2.07E-07 | 1.57E-05 | up |
| PBK            | 1.163469 | 0.000289 | 0.003118 | up |
| AGXT           | 1.162437 | 3.08E-05 | 0.000571 | up |
| CENPH          | 1.161537 | 4.19E-05 | 0.000716 | up |
| TMEM158        | 1.159797 | 0.000217 | 0.002494 | up |
| TFAP2C         | 1.156589 | 2.70E-07 | 1.85E-05 | up |
| PKDCC          | 1.154594 | 4.28E-05 | 0.000727 | up |
| KCNE3          | 1.154086 | 7.36E-06 | 0.000194 | up |
| NOL4           | 1.153824 | 0.000569 | 0.005271 | up |
| FAM72A         | 1.153168 | 0.000428 | 0.004231 | up |
| PRSS2          | 1.14976  | 6.78E-06 | 0.000183 | up |
| XLOC_12_014101 | 1.149759 | 8.62E-08 | 8.62E-06 | up |
| PPFIA3         | 1.146131 | 1.07E-05 | 0.000257 | up |
| SNAR-F         | 1.14564  | 0.001651 | 0.01214  | up |
| XLOC_002867    | 1.143406 | 3.67E-06 | 0.000117 | up |
| ARSE           | 1.141604 | 8.54E-05 | 0.001238 | up |
| PITX2          | 1.141523 | 0.001279 | 0.009956 | up |
| ZNF462         | 1.139313 | 6.73E-08 | 7.37E-06 | up |
| LOC283663      | 1.138654 | 0.000176 | 0.002138 | up |
| MATN2          | 1.137159 | 6.59E-06 | 0.000179 | up |
| NT5E           | 1.136819 | 8.25E-05 | 0.001206 | up |
| SLC6A20        | 1.136117 | 0.001154 | 0.009205 | up |
| ACRBP          | 1.132736 | 2.66E-06 | 9.26E-05 | up |
| EPHA1          | 1.132239 | 8.04E-07 | 3.93E-05 | up |
| VIPR1          | 1.132107 | 9.35E-07 | 4.37E-05 | up |
| CXCL3          | 1.132099 | 0.015069 | 0.066986 | up |
| XLOC_003355    | 1.130686 | 3.06E-06 | 0.000102 | up |
| ESCO2          | 1.130426 | 1.55E-05 | 0.00034  | up |
| CLSPN          | 1.129052 | 0.000117 | 0.001586 | up |
| FAM176A        | 1.128928 | 3.13E-05 | 0.000578 | up |
| MESP2          | 1.128301 | 9.53E-06 | 0.000235 | up |
| SCG2           | 1.126428 | 0.003378 | 0.021168 | up |
| CDC6           | 1.125782 | 0.000182 | 0.002194 | up |
| LOC388780      | 1.125709 | 0.003053 | 0.019585 | up |

---

---

|              |          |          |          |    |
|--------------|----------|----------|----------|----|
| TM6SF2       | 1.125557 | 0.000728 | 0.006394 | up |
| TPMT         | 1.122442 | 2.28E-08 | 3.64E-06 | up |
| PVRL1        | 1.121782 | 2.08E-06 | 7.69E-05 | up |
| LOC100506957 | 1.12167  | 0.002703 | 0.017824 | up |
| ACOX2        | 1.119954 | 1.84E-05 | 0.000385 | up |
| CDHR2        | 1.117899 | 0.000996 | 0.008185 | up |
| CCNA2        | 1.117389 | 0.000296 | 0.00318  | up |
| EFNA3        | 1.116108 | 4.89E-05 | 0.000809 | up |
| FAM72D       | 1.116066 | 6.29E-05 | 0.000976 | up |
| XLOC_013754  | 1.115233 | 4.10E-05 | 0.000705 | up |
| LMTK3        | 1.115147 | 1.06E-06 | 4.79E-05 | up |
| PRR5L        | 1.113174 | 8.41E-06 | 0.000214 | up |
| CLCN2        | 1.112632 | 1.03E-06 | 4.69E-05 | up |
| QPCT         | 1.111537 | 0.000146 | 0.001865 | up |
| MANEAL       | 1.108842 | 6.44E-09 | 1.83E-06 | up |
| S100A6       | 1.108096 | 4.18E-07 | 2.51E-05 | up |
| PDSS1        | 1.107798 | 2.50E-05 | 0.000485 | up |
| HIST1H2BF    | 1.1064   | 0.000123 | 0.00164  | up |
| TRIM31       | 1.104944 | 0.000286 | 0.00309  | up |
| LOC100128593 | 1.103215 | 5.55E-06 | 0.000158 | up |
| FLVCR2       | 1.103124 | 0.001622 | 0.011968 | up |
| XLOC_011755  | 1.101837 | 6.65E-07 | 3.46E-05 | up |
| IL22RA1      | 1.101263 | 9.28E-06 | 0.00023  | up |
| SSX2IP       | 1.101222 | 6.15E-06 | 0.00017  | up |
| PLK4         | 1.100761 | 7.36E-05 | 0.001105 | up |
| YBX2         | 1.100742 | 0.001776 | 0.012874 | up |
| XLOC_003735  | 1.100701 | 3.98E-05 | 0.000687 | up |
| LOC389634    | 1.099796 | 0.000224 | 0.002547 | up |
| ZIC5         | 1.099713 | 6.33E-05 | 0.00098  | up |
| SHCBP1       | 1.09927  | 0.001803 | 0.013029 | up |
| TGM2         | 1.097379 | 0.006204 | 0.033846 | up |
| C9orf40      | 1.096991 | 2.63E-07 | 1.83E-05 | up |
| CKAP2L       | 1.096902 | 0.000462 | 0.004471 | up |
| ABCC13       | 1.095574 | 0.033434 | 0.12176  | up |
| XLOC_012977  | 1.09529  | 0.000273 | 0.002981 | up |
| NEK11        | 1.094245 | 2.57E-06 | 8.99E-05 | up |
| FAM151B      | 1.093573 | 1.31E-05 | 0.0003   | up |
| CEP55        | 1.092864 | 0.000325 | 0.003425 | up |
| NR1H4        | 1.090447 | 0.021889 | 0.088789 | up |
| FLJ39095     | 1.090393 | 8.00E-05 | 0.001183 | up |
| GPR153       | 1.089357 | 0.001018 | 0.008334 | up |
| PITX1        | 1.088165 | 2.35E-06 | 8.45E-05 | up |
| ANXA8L2      | 1.087666 | 0.000796 | 0.006885 | up |
| LIPG         | 1.087491 | 0.000902 | 0.007556 | up |

---

---

|                |          |          |          |    |
|----------------|----------|----------|----------|----|
| MYBL2          | 1.084013 | 0.000464 | 0.004492 | up |
| CEACAM20       | 1.083633 | 3.55E-06 | 0.000115 | up |
| LOC100287415   | 1.083627 | 0.000357 | 0.003679 | up |
| MAD2L1         | 1.08212  | 0.000211 | 0.002443 | up |
| CXCL1          | 1.081704 | 0.013536 | 0.061663 | up |
| RAD54L         | 1.080709 | 0.00015  | 0.0019   | up |
| LOC100505909   | 1.080438 | 0.000686 | 0.00612  | up |
| POLE2          | 1.079749 | 2.18E-05 | 0.000437 | up |
| FLJ35424       | 1.079348 | 0.042897 | 0.14707  | up |
| BDKRB1         | 1.079209 | 9.44E-05 | 0.001339 | up |
| LINC00336      | 1.078609 | 3.51E-05 | 0.000626 | up |
| XLOC_009181    | 1.078305 | 0.000975 | 0.00806  | up |
| KRT16          | 1.077474 | 0.004451 | 0.026193 | up |
| KIFC1          | 1.077466 | 0.000219 | 0.002507 | up |
| GDPD2          | 1.076644 | 0.001563 | 0.011645 | up |
| ARX            | 1.076215 | 2.15E-05 | 0.000432 | up |
| NOD1           | 1.075657 | 5.20E-06 | 0.000151 | up |
| FAM131B        | 1.075531 | 0.000162 | 0.002014 | up |
| DYX1C1         | 1.07474  | 8.85E-06 | 0.000222 | up |
| TMPRSS4        | 1.074259 | 7.69E-06 | 0.0002   | up |
| ABTB2          | 1.074144 | 0.000114 | 0.001552 | up |
| HSD17B2        | 1.074061 | 0.000277 | 0.003021 | up |
| CST6           | 1.070371 | 0.023205 | 0.092956 | up |
| CYP4F3         | 1.070087 | 0.006357 | 0.03451  | up |
| INPP1          | 1.069755 | 9.19E-06 | 0.000229 | up |
| FAM54A         | 1.069687 | 0.000127 | 0.001677 | up |
| LCN15          | 1.068965 | 0.006056 | 0.033234 | up |
| LOC100134138   | 1.0686   | 0.014233 | 0.064116 | up |
| SLC6A12        | 1.068207 | 0.034178 | 0.123809 | up |
| LDHC           | 1.067511 | 0.001032 | 0.008427 | up |
| CYP27B1        | 1.067406 | 4.45E-06 | 0.000135 | up |
| XLOC_014263    | 1.065577 | 0.001045 | 0.008497 | up |
| XLOC_l2_008289 | 1.065433 | 2.70E-06 | 9.32E-05 | up |
| MTMR11         | 1.064886 | 6.29E-05 | 0.000977 | up |
| MSX2P1         | 1.063877 | 7.05E-07 | 3.59E-05 | up |
| TM4SF1         | 1.062646 | 1.55E-06 | 6.30E-05 | up |
| DHRS11         | 1.062493 | 0.000132 | 0.001728 | up |
| XLOC_005924    | 1.062085 | 2.73E-06 | 9.34E-05 | up |
| XLOC_l2_013480 | 1.060808 | 5.51E-06 | 0.000158 | up |
| ACAA2          | 1.060064 | 6.60E-07 | 3.44E-05 | up |
| TMEM139        | 1.058597 | 1.13E-05 | 0.000268 | up |
| XLOC_007398    | 1.058447 | 0.010951 | 0.052445 | up |
| TRIM7          | 1.058441 | 0.003277 | 0.020678 | up |
| TFPI           | 1.057876 | 0.000106 | 0.001468 | up |

---

---

|                |          |          |          |    |
|----------------|----------|----------|----------|----|
| BCMO1          | 1.057792 | 0.001218 | 0.009598 | up |
| SLC18A1        | 1.057688 | 7.72E-05 | 0.001149 | up |
| IL11           | 1.056882 | 0.001277 | 0.009946 | up |
| SERPIN8        | 1.056208 | 0.000339 | 0.003532 | up |
| PTPRO          | 1.055077 | 0.009474 | 0.046936 | up |
| MPV17L         | 1.053554 | 1.72E-05 | 0.000369 | up |
| PLCB3          | 1.052388 | 9.59E-06 | 0.000236 | up |
| AQP12A         | 1.052341 | 0.00029  | 0.003128 | up |
| SNORD86        | 1.051101 | 0.000105 | 0.001448 | up |
| FAS            | 1.048982 | 2.04E-05 | 0.000416 | up |
| P2RX6P         | 1.048443 | 0.000601 | 0.005514 | up |
| KREMEN2        | 1.048146 | 0.000882 | 0.007431 | up |
| KHK            | 1.048071 | 0.001573 | 0.011696 | up |
| GPR172B        | 1.047663 | 0.005221 | 0.0296   | up |
| RAD51          | 1.047506 | 0.00013  | 0.001703 | up |
| CENPK          | 1.046856 | 0.000434 | 0.004278 | up |
| SLC35G1        | 1.045094 | 0.00561  | 0.031315 | up |
| TIMP1          | 1.044383 | 4.17E-08 | 5.51E-06 | up |
| C11orf82       | 1.044356 | 0.001525 | 0.011419 | up |
| CA13           | 1.044158 | 1.56E-05 | 0.000343 | up |
| MCM10          | 1.043581 | 0.001357 | 0.010445 | up |
| E2F2           | 1.04092  | 0.000141 | 0.001816 | up |
| HIST1H3J       | 1.040832 | 6.76E-06 | 0.000182 | up |
| TFAP2A         | 1.040236 | 4.90E-05 | 0.000811 | up |
| C20orf202      | 1.0385   | 1.31E-05 | 0.0003   | up |
| C9orf171       | 1.037533 | 0.000298 | 0.003192 | up |
| XLOC_008426    | 1.037481 | 0.004688 | 0.02724  | up |
| PROM1          | 1.036397 | 7.16E-06 | 0.00019  | up |
| ACER3          | 1.036289 | 5.64E-05 | 0.0009   | up |
| PRR7           | 1.036002 | 5.74E-07 | 3.10E-05 | up |
| OIP5           | 1.035668 | 0.000226 | 0.002573 | up |
| CCDC68         | 1.035572 | 0.000682 | 0.006091 | up |
| XLOC_12_008546 | 1.035561 | 1.18E-07 | 1.07E-05 | up |
| HOXB3          | 1.03503  | 6.26E-05 | 0.000974 | up |
| HIST1H2AG      | 1.03275  | 0.000114 | 0.001551 | up |
| XLOC_009398    | 1.032687 | 0.013277 | 0.060762 | up |
| LOC100288911   | 1.031857 | 1.96E-05 | 0.000404 | up |
| ADRA2C         | 1.031275 | 5.54E-05 | 0.000891 | up |
| P2RY2          | 1.03029  | 0.000969 | 0.008016 | up |
| LOC100506110   | 1.029508 | 9.78E-07 | 4.50E-05 | up |
| MAGEA2B        | 1.027608 | 0.011548 | 0.0547   | up |
| LGALS4         | 1.027255 | 1.42E-05 | 0.000318 | up |
| C1QTNF1        | 1.024717 | 0.004671 | 0.02716  | up |
| ACSBG1         | 1.024662 | 0.002512 | 0.016807 | up |

---



---

|              |          |          |          |      |
|--------------|----------|----------|----------|------|
| MOCOS        | 1.023867 | 8.93E-05 | 0.001278 | up   |
| KIF12        | 1.023756 | 4.61E-09 | 1.56E-06 | up   |
| TSPAN2       | 1.023555 | 0.000131 | 0.00171  | up   |
| PLBD1        | 1.023234 | 1.75E-08 | 3.10E-06 | up   |
| EPCAM        | 1.021512 | 2.54E-07 | 1.78E-05 | up   |
| MYT1         | 1.020803 | 9.25E-07 | 4.34E-05 | up   |
| MAGEA6       | 1.020324 | 0.0253   | 0.098993 | up   |
| XLOC_007093  | 1.020081 | 5.47E-07 | 3.02E-05 | up   |
| KIAA1462     | 1.0192   | 0.002678 | 0.0177   | up   |
| DUSP10       | 1.018215 | 4.86E-07 | 2.81E-05 | up   |
| GSG2         | 1.017339 | 0.00104  | 0.008474 | up   |
| HIST1H1B     | 1.016787 | 0.000168 | 0.002061 | up   |
| KDM1B        | 1.016616 | 3.31E-06 | 0.000109 | up   |
| ARSJ         | 1.016097 | 9.96E-05 | 0.001397 | up   |
| MSMP         | 1.014972 | 3.77E-06 | 0.00012  | up   |
| LOC647086    | 1.014779 | 2.32E-05 | 0.000458 | up   |
| NEK2         | 1.014767 | 0.000251 | 0.002799 | up   |
| GPSM2        | 1.014465 | 6.49E-07 | 3.41E-05 | up   |
| HMOX1        | 1.014306 | 0.00024  | 0.002706 | up   |
| CDCA2        | 1.012732 | 0.000969 | 0.008016 | up   |
| SLC38A11     | 1.012076 | 0.002672 | 0.017669 | up   |
| F3           | 1.011991 | 6.83E-06 | 0.000184 | up   |
| CYP3A7       | 1.011546 | 0.002089 | 0.014593 | up   |
| XLOC_006200  | 1.011218 | 0.006542 | 0.035324 | up   |
| RDM1         | 1.010632 | 0.000958 | 0.007945 | up   |
| RSPH1        | 1.010469 | 1.11E-07 | 1.02E-05 | up   |
| LOC100506561 | 1.00645  | 0.000126 | 0.001669 | up   |
| NR6A1        | 1.005645 | 1.24E-05 | 0.000287 | up   |
| SLC46A3      | 1.005473 | 0.005355 | 0.030209 | up   |
| INPP4A       | 1.005126 | 1.06E-05 | 0.000256 | up   |
| PODNL1       | 1.005064 | 9.58E-07 | 4.43E-05 | up   |
| MEX3A        | 1.003529 | 0.001082 | 0.008722 | up   |
| XLOC_012638  | 1.002299 | 0.001863 | 0.013356 | up   |
| PCDHB14      | 1.002245 | 0.001315 | 0.010183 | up   |
| HIST2H3A     | 1.001526 | 0.000236 | 0.002666 | up   |
| GALM         | 1.001318 | 1.47E-07 | 1.25E-05 | up   |
| C1orf201     | 1.000218 | 1.82E-06 | 7.17E-05 | up   |
| NEFL         | -1.00057 | 0.000962 | 0.007972 | down |
| COBLL1       | -1.00129 | 7.46E-08 | 7.84E-06 | down |
| XLOC_009945  | -1.00135 | 0.000376 | 0.003834 | down |
| ATP7A        | -1.00163 | 3.40E-06 | 0.000111 | down |
| XLOC_014068  | -1.0035  | 0.000389 | 0.003932 | down |
| XLOC_009303  | -1.00379 | 0.014511 | 0.065026 | down |
| SEMA4A       | -1.00453 | 9.33E-08 | 9.11E-06 | down |

---

---

|              |          |          |          |      |
|--------------|----------|----------|----------|------|
| XLOC_005101  | -1.00475 | 4.49E-05 | 0.000755 | down |
| PLVAP        | -1.00514 | 1.83E-05 | 0.000385 | down |
| LOC100294145 | -1.00559 | 7.13E-05 | 0.001077 | down |
| WTIP         | -1.00568 | 1.38E-06 | 5.82E-05 | down |
| RGS11        | -1.00599 | 0.000856 | 0.007252 | down |
| TM7SF2       | -1.00655 | 7.35E-06 | 0.000194 | down |
| PRKD1        | -1.00675 | 2.17E-05 | 0.000435 | down |
| XLOC_001441  | -1.00683 | 0.002137 | 0.014854 | down |
| XLOC_010308  | -1.00767 | 0.000204 | 0.002377 | down |
| HLA-DQA1     | -1.00797 | 0.020379 | 0.08419  | down |
| DBN1         | -1.00908 | 0.000505 | 0.004805 | down |
| MIR143HG     | -1.00955 | 0.000253 | 0.002816 | down |
| XLOC_001641  | -1.00958 | 8.34E-05 | 0.001214 | down |
| FBXO17       | -1.01072 | 3.07E-05 | 0.000569 | down |
| CHI3L2       | -1.01151 | 0.004305 | 0.02556  | down |
| LOC285191    | -1.01241 | 8.54E-05 | 0.001238 | down |
| PSPN         | -1.01325 | 0.000138 | 0.001793 | down |
| AMHR2        | -1.0133  | 0.000496 | 0.004733 | down |
| CCDC169      | -1.01391 | 4.40E-05 | 0.000743 | down |
| SLC9A9       | -1.01465 | 1.03E-06 | 4.68E-05 | down |
| GPR68        | -1.01517 | 3.86E-09 | 1.43E-06 | down |
| XLOC_008183  | -1.01564 | 1.60E-07 | 1.31E-05 | down |
| TBC1D10C     | -1.01569 | 8.67E-07 | 4.16E-05 | down |
| XLOC_002953  | -1.01576 | 6.72E-05 | 0.00103  | down |
| SOX2         | -1.01682 | 0.000234 | 0.002655 | down |
| ADAMTS19     | -1.01835 | 0.00081  | 0.006969 | down |
| C15orf27     | -1.01836 | 0.002205 | 0.015219 | down |
| KCNQ1        | -1.01847 | 0.00022  | 0.002517 | down |
| SLC6A16      | -1.0203  | 4.33E-07 | 2.58E-05 | down |
| XLOC_001066  | -1.02056 | 0.002058 | 0.014421 | down |
| IGFBP2       | -1.02101 | 9.69E-07 | 4.47E-05 | down |
| LOC100507673 | -1.02104 | 7.64E-05 | 0.001139 | down |
| DOCK2        | -1.02113 | 1.29E-05 | 0.000297 | down |
| XLOC_012083  | -1.02132 | 0.002494 | 0.016715 | down |
| DPYSL4       | -1.02339 | 2.67E-05 | 0.000511 | down |
| GTF3C3       | -1.02378 | 2.38E-05 | 0.000466 | down |
| CMAHP        | -1.02416 | 2.72E-06 | 9.32E-05 | down |
| TNFRSF8      | -1.02474 | 0.000421 | 0.004178 | down |
| LRRC27       | -1.02645 | 1.74E-05 | 0.000371 | down |
| MAF          | -1.02755 | 0.000177 | 0.002144 | down |
| GPRC5C       | -1.02857 | 5.74E-06 | 0.000162 | down |
| LPL          | -1.02934 | 0.004284 | 0.025463 | down |
| MDGA1        | -1.02969 | 0.000613 | 0.005596 | down |
| XLOC_009023  | -1.03037 | 1.61E-05 | 0.000352 | down |

---

---

|                |          |          |          |      |
|----------------|----------|----------|----------|------|
| GZMK           | -1.03064 | 0.000324 | 0.003417 | down |
| TRIM53P        | -1.03073 | 0.000335 | 0.003497 | down |
| LOC401847      | -1.03074 | 0.001799 | 0.013011 | down |
| SLC22A12       | -1.03148 | 6.56E-05 | 0.00101  | down |
| XLOC_006916    | -1.03319 | 0.00038  | 0.003868 | down |
| GSTA2          | -1.03459 | 0.002297 | 0.015717 | down |
| XLOC_l2_004840 | -1.03525 | 8.14E-05 | 0.001196 | down |
| GJD3           | -1.03558 | 1.82E-06 | 7.15E-05 | down |
| FAM183A        | -1.03596 | 0.000738 | 0.006457 | down |
| PSTPIP1        | -1.0362  | 1.04E-07 | 9.74E-06 | down |
| RNASE1         | -1.03805 | 0.000182 | 0.002191 | down |
| XLOC_l2_011908 | -1.03858 | 0.000192 | 0.002287 | down |
| TMEM121        | -1.03872 | 1.36E-06 | 5.74E-05 | down |
| SMAD9          | -1.03878 | 8.75E-07 | 4.17E-05 | down |
| LOC100652948   | -1.039   | 6.99E-05 | 0.001061 | down |
| MEI1           | -1.03982 | 0.000344 | 0.00357  | down |
| MLL3           | -1.03995 | 5.38E-07 | 3.00E-05 | down |
| SGK1           | -1.04028 | 0.00021  | 0.002435 | down |
| ACSM5          | -1.04034 | 1.86E-05 | 0.000388 | down |
| GSTA5          | -1.04093 | 0.000986 | 0.008134 | down |
| XLOC_l2_015894 | -1.04233 | 1.98E-06 | 7.45E-05 | down |
| SALL2          | -1.04258 | 2.85E-07 | 1.91E-05 | down |
| CFH            | -1.04283 | 0.000129 | 0.001692 | down |
| OR4D11         | -1.0429  | 0.001771 | 0.012848 | down |
| XLOC_013965    | -1.04357 | 6.72E-07 | 3.48E-05 | down |
| C1orf190       | -1.04495 | 4.04E-05 | 0.000697 | down |
| LPHN2          | -1.04526 | 3.69E-06 | 0.000117 | down |
| LOC100507333   | -1.04698 | 1.69E-05 | 0.000366 | down |
| SPOCK1         | -1.04771 | 0.000239 | 0.002694 | down |
| IL7R           | -1.04888 | 6.83E-05 | 0.001043 | down |
| PRKCB          | -1.04906 | 0.000504 | 0.0048   | down |
| LONRF2         | -1.04944 | 0.004152 | 0.024839 | down |
| XLOC_000712    | -1.04977 | 1.20E-05 | 0.000279 | down |
| ZNF831         | -1.05046 | 0.000112 | 0.001537 | down |
| DNAH8          | -1.05205 | 0.000185 | 0.002217 | down |
| XLOC_l2_013863 | -1.05206 | 8.12E-06 | 0.000208 | down |
| PLA2G1B        | -1.0526  | 0.01579  | 0.069382 | down |
| XLOC_000643    | -1.05362 | 0.003395 | 0.021245 | down |
| LOC100130345   | -1.05389 | 2.85E-05 | 0.000538 | down |
| FAM127C        | -1.05529 | 0.000183 | 0.002203 | down |
| METTL7A        | -1.05718 | 3.85E-07 | 2.34E-05 | down |
| GAS1           | -1.05748 | 0.000324 | 0.003417 | down |
| LOC100507309   | -1.05947 | 3.35E-06 | 0.00011  | down |
| LOC283075      | -1.05962 | 0.000265 | 0.002916 | down |

---

---

|                |          |          |          |      |
|----------------|----------|----------|----------|------|
| XLOC_005548    | -1.05997 | 5.75E-05 | 0.000914 | down |
| ME3            | -1.06065 | 4.38E-07 | 2.60E-05 | down |
| FCHSD2         | -1.06124 | 4.40E-10 | 5.13E-07 | down |
| MID2           | -1.06181 | 3.50E-05 | 0.000625 | down |
| XLOC_000978    | -1.06265 | 5.62E-06 | 0.00016  | down |
| SIGLEC1        | -1.06342 | 1.05E-05 | 0.000253 | down |
| XLOC_l2_012855 | -1.06366 | 6.30E-05 | 0.000977 | down |
| FLJ37644       | -1.06375 | 0.001857 | 0.013319 | down |
| KL             | -1.06419 | 9.70E-05 | 0.001366 | down |
| BEAN1          | -1.0653  | 0.000436 | 0.004288 | down |
| ST3GAL6        | -1.06531 | 9.62E-06 | 0.000237 | down |
| FCRL2          | -1.07018 | 0.002346 | 0.015993 | down |
| OXCT1          | -1.07052 | 9.82E-08 | 9.35E-06 | down |
| XLOC_011023    | -1.07073 | 0.000647 | 0.005851 | down |
| PLTP           | -1.07186 | 0.000177 | 0.002147 | down |
| CCDC106        | -1.07259 | 6.67E-06 | 0.00018  | down |
| XLOC_l2_005415 | -1.07358 | 1.31E-05 | 0.0003   | down |
| ADAM28         | -1.07374 | 1.82E-05 | 0.000384 | down |
| LOC93444       | -1.07525 | 8.33E-05 | 0.001214 | down |
| C20orf194      | -1.07595 | 3.35E-07 | 2.15E-05 | down |
| ATG9B          | -1.07872 | 0.002364 | 0.016079 | down |
| DAND5          | -1.07882 | 0.001995 | 0.014086 | down |
| OBSL1          | -1.07912 | 6.47E-07 | 3.41E-05 | down |
| ZNF512B        | -1.07931 | 5.55E-07 | 3.04E-05 | down |
| SLC22A10       | -1.07997 | 0.000307 | 0.003277 | down |
| XLOC_004283    | -1.08    | 0.000245 | 0.002743 | down |
| GOLGA8A        | -1.08013 | 5.94E-05 | 0.000936 | down |
| LOC728723      | -1.08157 | 8.81E-05 | 0.001266 | down |
| Q6ILE4         | -1.08241 | 1.14E-05 | 0.00027  | down |
| ARMCX2         | -1.08264 | 2.04E-07 | 1.55E-05 | down |
| TESC           | -1.0832  | 0.000164 | 0.002025 | down |
| MRAS           | -1.08501 | 1.74E-06 | 6.97E-05 | down |
| SLC4A2         | -1.08643 | 2.95E-06 | 9.94E-05 | down |
| CCR10          | -1.08659 | 0.000237 | 0.002678 | down |
| SNORA48        | -1.0866  | 2.78E-05 | 0.000528 | down |
| TNFRSF13C      | -1.08708 | 0.000262 | 0.002886 | down |
| CCDC101        | -1.08773 | 0.00011  | 0.001515 | down |
| HS6ST3         | -1.08833 | 0.000115 | 0.001564 | down |
| XLOC_003872    | -1.08895 | 0.00026  | 0.002871 | down |
| NIN            | -1.08908 | 2.96E-07 | 1.96E-05 | down |
| DMRTC1         | -1.08984 | 0.000354 | 0.003661 | down |
| LOC100506662   | -1.09001 | 0.000217 | 0.002492 | down |
| LOC728503      | -1.09082 | 8.29E-05 | 0.001209 | down |
| XLOC_012145    | -1.09234 | 2.84E-05 | 0.000537 | down |

---

---

|                |          |          |          |      |
|----------------|----------|----------|----------|------|
| SLC9A3         | -1.0925  | 5.59E-05 | 0.000897 | down |
| CAPN13         | -1.09303 | 5.62E-07 | 3.06E-05 | down |
| ITIH4          | -1.09447 | 4.79E-07 | 2.78E-05 | down |
| XLOC_12_006138 | -1.09458 | 0.00189  | 0.013501 | down |
| XLOC_006793    | -1.09486 | 0.005948 | 0.032738 | down |
| VWA5B1         | -1.09499 | 1.35E-05 | 0.000308 | down |
| SARS           | -1.09521 | 8.68E-07 | 4.16E-05 | down |
| GPX3           | -1.0965  | 0.000484 | 0.004644 | down |
| NR3C1          | -1.09651 | 2.31E-05 | 0.000457 | down |
| ATP1B2         | -1.09691 | 1.18E-05 | 0.000277 | down |
| XLOC_12_008343 | -1.09827 | 6.27E-05 | 0.000975 | down |
| RASAL3         | -1.0987  | 1.59E-09 | 1.04E-06 | down |
| GHR            | -1.09903 | 2.14E-06 | 7.81E-05 | down |
| XLOC_008925    | -1.09908 | 0.005524 | 0.030926 | down |
| INE1           | -1.09944 | 3.68E-05 | 0.000648 | down |
| RBP7           | -1.09947 | 3.33E-05 | 0.000605 | down |
| LOC100292909   | -1.10011 | 3.24E-06 | 0.000107 | down |
| XLOC_011088    | -1.10032 | 4.73E-05 | 0.000789 | down |
| NYX            | -1.10106 | 6.07E-07 | 3.24E-05 | down |
| FAM46C         | -1.10168 | 7.44E-09 | 1.99E-06 | down |
| CD79B          | -1.10215 | 0.000949 | 0.007889 | down |
| KLHL6          | -1.10236 | 0.000212 | 0.00245  | down |
| DCLK2          | -1.10461 | 5.88E-06 | 0.000165 | down |
| OR56B1         | -1.10502 | 0.000712 | 0.006286 | down |
| LOC200261      | -1.10505 | 0.000193 | 0.00229  | down |
| NUP210         | -1.10512 | 0.000196 | 0.002313 | down |
| C1orf130       | -1.10535 | 0.000495 | 0.004727 | down |
| SIGLEC14       | -1.1062  | 8.65E-06 | 0.000219 | down |
| ABCA6          | -1.10719 | 4.81E-07 | 2.79E-05 | down |
| LOC100130093   | -1.10719 | 6.82E-07 | 3.52E-05 | down |
| HLA-DOA        | -1.10896 | 0.000173 | 0.002109 | down |
| XLOC_12_010330 | -1.10924 | 0.000108 | 0.001491 | down |
| OPN1MW         | -1.1095  | 0.000994 | 0.008182 | down |
| MMP19          | -1.11171 | 2.14E-06 | 7.81E-05 | down |
| STOX2          | -1.11225 | 2.84E-07 | 1.91E-05 | down |
| IGJ            | -1.11409 | 3.11E-05 | 0.000576 | down |
| XLOC_002411    | -1.11419 | 4.51E-06 | 0.000136 | down |
| NES            | -1.11441 | 1.10E-06 | 4.92E-05 | down |
| FAM20C         | -1.11484 | 9.34E-08 | 9.11E-06 | down |
| TRPV6          | -1.11508 | 2.89E-05 | 0.000542 | down |
| GLIS2          | -1.1185  | 2.38E-06 | 8.50E-05 | down |
| WNT6           | -1.1189  | 0.000171 | 0.00209  | down |
| S1PR3          | -1.12037 | 8.89E-05 | 0.001274 | down |
| WIPF3          | -1.12434 | 5.20E-07 | 2.94E-05 | down |

---

---

|               |          |          |          |      |
|---------------|----------|----------|----------|------|
| P2RY8         | -1.12445 | 7.20E-06 | 0.00019  | down |
| XLOC_007700   | -1.12529 | 2.36E-05 | 0.000465 | down |
| LOC729178     | -1.12532 | 0.000274 | 0.002993 | down |
| NGFRAP1       | -1.12754 | 6.94E-06 | 0.000186 | down |
| PELI2         | -1.12805 | 2.09E-06 | 7.73E-05 | down |
| SLITRK4       | -1.12974 | 0.00043  | 0.004244 | down |
| OPN4          | -1.13019 | 0.000172 | 0.002101 | down |
| LOC100507334  | -1.13114 | 0.00038  | 0.003862 | down |
| NRTN          | -1.1331  | 0.001251 | 0.009788 | down |
| VPREB3        | -1.13328 | 0.000946 | 0.007871 | down |
| SPIRE1        | -1.13351 | 3.30E-08 | 4.74E-06 | down |
| LOC401317     | -1.13508 | 3.56E-05 | 0.000631 | down |
| XLOC_010065   | -1.1351  | 3.04E-05 | 0.000564 | down |
| FAM155B       | -1.13592 | 0.004256 | 0.025323 | down |
| CA4           | -1.13595 | 0.000506 | 0.004807 | down |
| RIMBP3        | -1.13655 | 1.96E-07 | 1.52E-05 | down |
| TCL1A         | -1.14075 | 0.038842 | 0.136709 | down |
| LOC100128398  | -1.14088 | 1.23E-05 | 0.000286 | down |
| JMJD5         | -1.14152 | 3.29E-07 | 2.12E-05 | down |
| AIM2          | -1.14307 | 0.002859 | 0.01863  | down |
| LDLRAD2       | -1.14374 | 0.000222 | 0.002536 | down |
| FAM161A       | -1.14411 | 9.68E-06 | 0.000238 | down |
| FST           | -1.14451 | 0.003911 | 0.0237   | down |
| ST8SIA5       | -1.14499 | 0.00017  | 0.00208  | down |
| PKNOX2        | -1.14573 | 5.75E-05 | 0.000914 | down |
| KCNMB2        | -1.14621 | 0.004407 | 0.025997 | down |
| CHGA          | -1.14622 | 0.00041  | 0.004095 | down |
| CD27          | -1.1464  | 6.81E-06 | 0.000183 | down |
| DKFZP761C1711 | -1.14676 | 3.23E-05 | 0.000589 | down |
| ANKRD29       | -1.14792 | 2.17E-05 | 0.000435 | down |
| CSMD3         | -1.14993 | 0.000164 | 0.002027 | down |
| NAPSA         | -1.15215 | 1.12E-08 | 2.42E-06 | down |
| CNTN3         | -1.15308 | 8.85E-05 | 0.001271 | down |
| ZNF300P1      | -1.15338 | 0.000154 | 0.001934 | down |
| SLC18A2       | -1.15455 | 1.79E-05 | 0.000379 | down |
| TLE4          | -1.15761 | 0.000607 | 0.005554 | down |
| HLA-DOB       | -1.1594  | 0.000467 | 0.004515 | down |
| TGFB1I1       | -1.16099 | 9.10E-06 | 0.000227 | down |
| RNF152        | -1.16177 | 0.004354 | 0.025761 | down |
| SBK2          | -1.162   | 0.000141 | 0.001821 | down |
| C8orf46       | -1.16239 | 7.77E-07 | 3.83E-05 | down |
| ADCY1         | -1.16485 | 0.000126 | 0.001666 | down |
| NDN           | -1.16571 | 2.69E-07 | 1.85E-05 | down |
| PKIB          | -1.1672  | 9.65E-06 | 0.000237 | down |

---

---

|                |          |          |          |      |
|----------------|----------|----------|----------|------|
| XLOC_12_000920 | -1.16756 | 1.01E-05 | 0.000245 | down |
| APOA5          | -1.16846 | 0.000918 | 0.007681 | down |
| XLOC_010998    | -1.16895 | 4.77E-05 | 0.000794 | down |
| RAPSN          | -1.16938 | 0.000166 | 0.002049 | down |
| IRAK3          | -1.17097 | 0.000173 | 0.002103 | down |
| CFC1           | -1.17628 | 0.000251 | 0.002799 | down |
| FGF13          | -1.17681 | 0.000163 | 0.002016 | down |
| LOC100506123   | -1.17727 | 0.000734 | 0.006436 | down |
| TDRD9          | -1.17786 | 0.005984 | 0.032896 | down |
| ATXN7L2        | -1.17932 | 8.32E-05 | 0.001212 | down |
| BRD4           | -1.18064 | 5.55E-07 | 3.04E-05 | down |
| ZDBF2          | -1.18183 | 8.70E-06 | 0.00022  | down |
| CLECL1         | -1.18462 | 0.000524 | 0.004938 | down |
| LOC100507149   | -1.18487 | 3.96E-05 | 0.000686 | down |
| RIC3           | -1.18541 | 3.35E-06 | 0.00011  | down |
| XLOC_003603    | -1.18561 | 2.13E-05 | 0.00043  | down |
| APOE           | -1.18688 | 5.52E-06 | 0.000158 | down |
| ALDH1A1        | -1.1877  | 6.58E-08 | 7.23E-06 | down |
| TMEM235        | -1.18881 | 0.000171 | 0.002094 | down |
| EFS            | -1.18944 | 5.87E-07 | 3.16E-05 | down |
| MCHR1          | -1.18947 | 6.66E-05 | 0.001022 | down |
| ZBTB16         | -1.19177 | 0.000115 | 0.001565 | down |
| XLOC_003062    | -1.1923  | 9.75E-05 | 0.001372 | down |
| TCTN2          | -1.19232 | 0.000934 | 0.007793 | down |
| MAFG           | -1.19253 | 9.15E-08 | 8.97E-06 | down |
| GNAZ           | -1.1927  | 1.32E-05 | 0.000302 | down |
| XLOC_008152    | -1.19453 | 3.46E-07 | 2.18E-05 | down |
| GPT2           | -1.19577 | 5.60E-07 | 3.06E-05 | down |
| PP12613        | -1.19592 | 0.000172 | 0.0021   | down |
| CECR1          | -1.19596 | 2.25E-06 | 8.14E-05 | down |
| LOC100131043   | -1.19625 | 3.36E-05 | 0.000608 | down |
| AZGP1          | -1.19923 | 6.02E-05 | 0.000945 | down |
| HPX-2          | -1.19925 | 0.000271 | 0.002964 | down |
| HAPLN3         | -1.20137 | 9.26E-06 | 0.000229 | down |
| XLOC_010319    | -1.20218 | 0.019056 | 0.080153 | down |
| ZNF132         | -1.20258 | 2.20E-08 | 3.58E-06 | down |
| SLC5A5         | -1.20472 | 0.00085  | 0.007231 | down |
| RIMS3          | -1.20488 | 0.000158 | 0.001979 | down |
| LOC100131015   | -1.20637 | 1.95E-05 | 0.000403 | down |
| CTIF           | -1.20665 | 3.07E-06 | 0.000102 | down |
| LOC100131034   | -1.20853 | 3.09E-06 | 0.000103 | down |
| FRMD1          | -1.20859 | 1.66E-05 | 0.00036  | down |
| DIRAS1         | -1.21033 | 3.19E-05 | 0.000586 | down |
| EMID2          | -1.21298 | 1.16E-05 | 0.000274 | down |

---

---

|              |          |          |          |      |
|--------------|----------|----------|----------|------|
| MICALL1      | -1.21523 | 7.92E-09 | 2.02E-06 | down |
| NRIP3        | -1.21617 | 0.000193 | 0.002288 | down |
| GALT         | -1.21715 | 6.83E-07 | 3.52E-05 | down |
| LOC100506059 | -1.21795 | 6.43E-05 | 0.000993 | down |
| CERS4        | -1.21833 | 5.38E-06 | 0.000155 | down |
| GPRC5B       | -1.21836 | 8.36E-06 | 0.000213 | down |
| SLAMF7       | -1.21853 | 3.59E-05 | 0.000634 | down |
| ANKRD36B     | -1.21955 | 0.000116 | 0.001573 | down |
| PPP1R3C      | -1.22197 | 5.67E-07 | 3.08E-05 | down |
| PREX1        | -1.22446 | 9.79E-13 | 7.85E-09 | down |
| EYS          | -1.2245  | 4.17E-06 | 0.000129 | down |
| CNTD1        | -1.22513 | 3.96E-06 | 0.000124 | down |
| WISP2        | -1.22514 | 0.000845 | 0.007201 | down |
| MYEF2        | -1.22646 | 1.50E-06 | 6.19E-05 | down |
| PRSS33       | -1.22887 | 0.000116 | 0.001573 | down |
| SLC5A2       | -1.23742 | 1.25E-06 | 5.40E-05 | down |
| IL33         | -1.23865 | 0.000127 | 0.001675 | down |
| C5orf38      | -1.23978 | 8.55E-05 | 0.001238 | down |
| CYP4F22      | -1.24117 | 0.001919 | 0.013665 | down |
| LOC100507520 | -1.24148 | 1.71E-05 | 0.000368 | down |
| XLOC_002678  | -1.2452  | 1.54E-07 | 1.28E-05 | down |
| SLC9A7       | -1.24598 | 4.07E-09 | 1.45E-06 | down |
| LOC100192426 | -1.24604 | 1.60E-06 | 6.46E-05 | down |
| ZC3H12C      | -1.24619 | 1.52E-07 | 1.28E-05 | down |
| LOC100129840 | -1.24883 | 0.000189 | 0.002256 | down |
| CCDC149      | -1.24939 | 2.83E-06 | 9.61E-05 | down |
| ITGBL1       | -1.25034 | 0.000238 | 0.002682 | down |
| XLOC_011327  | -1.25111 | 4.11E-05 | 0.000706 | down |
| KIF1A        | -1.25111 | 0.002498 | 0.016731 | down |
| PPP4R4       | -1.25149 | 7.61E-06 | 0.000198 | down |
| LOC284578    | -1.25159 | 1.76E-05 | 0.000375 | down |
| PTGDR2       | -1.25222 | 1.41E-05 | 0.000317 | down |
| ZNF415       | -1.25259 | 7.36E-06 | 0.000194 | down |
| XLOC_006689  | -1.25428 | 0.001518 | 0.011383 | down |
| XLOC_001589  | -1.25443 | 2.13E-06 | 7.81E-05 | down |
| VEGFB        | -1.25638 | 7.60E-07 | 3.76E-05 | down |
| XLOC_002073  | -1.25698 | 0.00065  | 0.005871 | down |
| CD79A        | -1.25791 | 1.06E-07 | 9.89E-06 | down |
| CNIH3        | -1.25898 | 0.000817 | 0.007014 | down |
| C2orf74      | -1.2597  | 1.18E-05 | 0.000277 | down |
| IP6K3        | -1.26062 | 3.05E-05 | 0.000567 | down |
| BAIAP2       | -1.26258 | 5.04E-05 | 0.000827 | down |
| SLC9A7P1     | -1.26431 | 3.45E-09 | 1.37E-06 | down |
| XLOC_006035  | -1.2649  | 2.08E-06 | 7.69E-05 | down |

---



---

|                |          |          |          |      |
|----------------|----------|----------|----------|------|
| HIST2H2BF      | -1.26585 | 2.21E-06 | 8.04E-05 | down |
| FBLN1          | -1.26614 | 7.43E-05 | 0.001114 | down |
| CUX2           | -1.2665  | 2.84E-05 | 0.000537 | down |
| SLC25A4        | -1.27071 | 3.81E-07 | 2.33E-05 | down |
| RYR2           | -1.27469 | 3.10E-05 | 0.000573 | down |
| SNTB1          | -1.27528 | 4.09E-06 | 0.000128 | down |
| APOH           | -1.27572 | 0.006492 | 0.035098 | down |
| INA            | -1.27718 | 7.15E-07 | 3.62E-05 | down |
| FER1L4         | -1.27907 | 0.00042  | 0.004168 | down |
| XLOC_12_012919 | -1.27945 | 6.58E-05 | 0.001012 | down |
| FIGF           | -1.27974 | 0.000109 | 0.001502 | down |
| RAPGEF4        | -1.28004 | 1.91E-05 | 0.000398 | down |
| GC             | -1.28057 | 0.001526 | 0.011424 | down |
| LOC100505683   | -1.28567 | 7.49E-05 | 0.001121 | down |
| XLOC_12_011744 | -1.28573 | 3.22E-05 | 0.000588 | down |
| RORA           | -1.28822 | 2.05E-12 | 1.32E-08 | down |
| ADRB2          | -1.29121 | 0.000216 | 0.002485 | down |
| GATA5          | -1.29165 | 0.00038  | 0.003865 | down |
| LYPD6B         | -1.29218 | 8.77E-06 | 0.000221 | down |
| ZSCAN22        | -1.29581 | 2.35E-06 | 8.45E-05 | down |
| XLOC_002487    | -1.29813 | 6.08E-05 | 0.000952 | down |
| CSF1R          | -1.29933 | 1.29E-10 | 2.88E-07 | down |
| KRT73          | -1.3021  | 2.96E-07 | 1.96E-05 | down |
| LOC730236      | -1.30234 | 1.15E-07 | 1.05E-05 | down |
| DUSP19         | -1.30335 | 2.56E-05 | 0.000494 | down |
| XLOC_007535    | -1.30496 | 0.000242 | 0.002715 | down |
| XLOC_008102    | -1.30953 | 0.000461 | 0.004462 | down |
| NLGN4X         | -1.31149 | 5.14E-05 | 0.00084  | down |
| RASGRP2        | -1.31207 | 8.25E-07 | 4.00E-05 | down |
| BASP1          | -1.31254 | 1.65E-06 | 6.63E-05 | down |
| HTR1E          | -1.31298 | 1.38E-05 | 0.000311 | down |
| PPARGC1A       | -1.31398 | 7.52E-05 | 0.001124 | down |
| CCDC110        | -1.31786 | 3.16E-06 | 0.000105 | down |
| DGKD           | -1.31848 | 2.58E-09 | 1.18E-06 | down |
| XLOC_012044    | -1.31855 | 0.000179 | 0.002164 | down |
| DCAF12L1       | -1.32192 | 1.30E-05 | 0.000298 | down |
| MAP7D2         | -1.32315 | 9.65E-06 | 0.000237 | down |
| MGC16025       | -1.32383 | 0.000338 | 0.003528 | down |
| CABP1          | -1.32399 | 1.47E-05 | 0.000328 | down |
| XLOC_002664    | -1.32401 | 9.92E-05 | 0.001393 | down |
| XLOC_007928    | -1.32635 | 3.71E-05 | 0.000651 | down |
| NFATC2         | -1.32706 | 5.11E-07 | 2.91E-05 | down |
| PPP3CC         | -1.32727 | 7.29E-09 | 1.98E-06 | down |
| TTN            | -1.32782 | 3.44E-05 | 0.000618 | down |

---

---

|                |          |          |          |      |
|----------------|----------|----------|----------|------|
| TMEM132A       | -1.32853 | 6.24E-05 | 0.000971 | down |
| RAPH1          | -1.32867 | 4.31E-06 | 0.000132 | down |
| CXCR4          | -1.32878 | 4.98E-06 | 0.000147 | down |
| GSTT2B         | -1.32935 | 1.75E-05 | 0.000372 | down |
| IL11RA         | -1.33026 | 8.18E-08 | 8.34E-06 | down |
| PDE4A          | -1.33191 | 2.99E-07 | 1.97E-05 | down |
| CELA2B         | -1.33269 | 0.001439 | 0.010907 | down |
| CYP7B1         | -1.33547 | 3.26E-06 | 0.000108 | down |
| XLOC_l2_013972 | -1.33668 | 0.000195 | 0.002301 | down |
| CSRP2          | -1.339   | 4.37E-06 | 0.000133 | down |
| C8orf78        | -1.34019 | 8.07E-07 | 3.93E-05 | down |
| LOC728606      | -1.34024 | 2.67E-05 | 0.00051  | down |
| EPOR           | -1.34334 | 6.38E-08 | 7.11E-06 | down |
| NIM1           | -1.3441  | 0.000114 | 0.001556 | down |
| GKN2           | -1.34602 | 0.00068  | 0.006087 | down |
| ELL2           | -1.34634 | 5.53E-08 | 6.62E-06 | down |
| XLOC_006193    | -1.34711 | 0.000315 | 0.003348 | down |
| C11orf92       | -1.35065 | 1.11E-06 | 4.93E-05 | down |
| SARDH          | -1.35128 | 3.60E-06 | 0.000116 | down |
| IPO11          | -1.35346 | 1.61E-06 | 6.48E-05 | down |
| MAGEH1         | -1.35374 | 6.15E-08 | 6.91E-06 | down |
| CYB5R1         | -1.35598 | 7.58E-09 | 1.99E-06 | down |
| ATP11C         | -1.3561  | 5.49E-07 | 3.03E-05 | down |
| DKK1           | -1.35781 | 0.000835 | 0.007135 | down |
| APOC4          | -1.35974 | 1.20E-06 | 5.22E-05 | down |
| SMR3A          | -1.35979 | 2.61E-05 | 0.000502 | down |
| SNORD116-19    | -1.36246 | 1.13E-06 | 5.01E-05 | down |
| C10orf11       | -1.36339 | 5.25E-07 | 2.95E-05 | down |
| ALDH1L1        | -1.3677  | 0.000188 | 0.002241 | down |
| XLOC_008207    | -1.36775 | 0.005637 | 0.03144  | down |
| LOC100506235   | -1.36787 | 2.29E-05 | 0.000455 | down |
| LOC100144602   | -1.36821 | 3.16E-05 | 0.000581 | down |
| PTPRM          | -1.36853 | 1.42E-08 | 2.83E-06 | down |
| OSBPL6         | -1.37089 | 6.96E-09 | 1.92E-06 | down |
| GPR116         | -1.37183 | 8.01E-05 | 0.001183 | down |
| LOC389493      | -1.37251 | 2.82E-05 | 0.000534 | down |
| ARMCX1         | -1.37381 | 1.48E-08 | 2.88E-06 | down |
| SLC35F3        | -1.37445 | 0.00041  | 0.004095 | down |
| SYN2           | -1.37539 | 3.65E-07 | 2.28E-05 | down |
| XLOC_000757    | -1.37763 | 0.000874 | 0.00737  | down |
| MS4A1          | -1.37867 | 0.000944 | 0.007864 | down |
| RAB11FIP2      | -1.37962 | 2.01E-07 | 1.54E-05 | down |
| FERD3L         | -1.38229 | 2.72E-06 | 9.32E-05 | down |
| GFRA4          | -1.38273 | 0.000166 | 0.002046 | down |

---

---

|                |          |          |          |      |
|----------------|----------|----------|----------|------|
| DUOXA1         | -1.38288 | 4.72E-06 | 0.000141 | down |
| CCL19          | -1.38349 | 0.003172 | 0.020193 | down |
| ASB11          | -1.3845  | 3.00E-06 | 0.000101 | down |
| C4orf39        | -1.39161 | 0.001064 | 0.008614 | down |
| LOC100287865   | -1.39458 | 1.97E-05 | 0.000405 | down |
| CCL16          | -1.39492 | 2.86E-05 | 0.000539 | down |
| PRKAA2         | -1.39633 | 1.11E-05 | 0.000266 | down |
| XLOC_010411    | -1.39976 | 0.000208 | 0.002412 | down |
| TMCO5A         | -1.40158 | 4.99E-05 | 0.000821 | down |
| CLDN19         | -1.40365 | 1.97E-06 | 7.45E-05 | down |
| SLC22A20       | -1.40504 | 6.88E-06 | 0.000185 | down |
| CELF4          | -1.40735 | 3.29E-05 | 0.000599 | down |
| IGFBP5         | -1.41224 | 5.70E-05 | 0.000908 | down |
| CYP2C8         | -1.41337 | 0.000142 | 0.001832 | down |
| LDHB           | -1.41627 | 2.27E-06 | 8.19E-05 | down |
| FAM110B        | -1.41829 | 6.44E-07 | 3.40E-05 | down |
| CXCR5          | -1.42099 | 0.00201  | 0.014159 | down |
| LINC00319      | -1.42236 | 3.61E-06 | 0.000116 | down |
| NR2F2          | -1.42284 | 4.50E-08 | 5.80E-06 | down |
| ADA            | -1.42284 | 3.54E-05 | 0.000629 | down |
| TP73-AS1       | -1.42336 | 1.29E-07 | 1.13E-05 | down |
| CTSF           | -1.42396 | 1.07E-06 | 4.84E-05 | down |
| CA9            | -1.42464 | 2.57E-06 | 8.99E-05 | down |
| LOC100507429   | -1.42518 | 3.22E-05 | 0.000589 | down |
| PLA1A          | -1.42737 | 7.77E-07 | 3.83E-05 | down |
| SCD5           | -1.43022 | 7.09E-05 | 0.001073 | down |
| LOC284244      | -1.43206 | 2.05E-06 | 7.64E-05 | down |
| COL6A5         | -1.43213 | 2.46E-05 | 0.000478 | down |
| XLOC_005458    | -1.43261 | 7.44E-06 | 0.000196 | down |
| ARHGEF17       | -1.43294 | 7.00E-09 | 1.92E-06 | down |
| ALDH3A1        | -1.43625 | 3.60E-06 | 0.000115 | down |
| MZB1           | -1.43691 | 2.70E-05 | 0.000516 | down |
| KRTAP5-7       | -1.43805 | 0.000128 | 0.001689 | down |
| COLEC12        | -1.43806 | 1.88E-06 | 7.28E-05 | down |
| XLOC_004600    | -1.43874 | 0.000193 | 0.002288 | down |
| XLOC_014403    | -1.44165 | 2.00E-05 | 0.000409 | down |
| GSTM2          | -1.44217 | 2.39E-09 | 1.17E-06 | down |
| LRRFIP1        | -1.44238 | 7.21E-08 | 7.68E-06 | down |
| LOC100289090   | -1.44527 | 3.13E-05 | 0.000578 | down |
| FZD4           | -1.44641 | 5.83E-09 | 1.75E-06 | down |
| LOC100507069   | -1.44643 | 2.28E-05 | 0.000452 | down |
| RGL3           | -1.44683 | 5.47E-07 | 3.02E-05 | down |
| XLOC_006283    | -1.44729 | 2.49E-06 | 8.78E-05 | down |
| XLOC_l2_004168 | -1.44927 | 1.14E-06 | 5.01E-05 | down |

---

---

|                |          |          |          |      |
|----------------|----------|----------|----------|------|
| PLIN4          | -1.45069 | 0.000699 | 0.006195 | down |
| XLOC_002243    | -1.45122 | 5.77E-05 | 0.000916 | down |
| XLOC_007653    | -1.45182 | 9.70E-05 | 0.001366 | down |
| GPC3           | -1.45195 | 0.000101 | 0.001415 | down |
| NUPR1          | -1.45325 | 6.93E-06 | 0.000185 | down |
| SLC41A1        | -1.45447 | 6.50E-08 | 7.19E-06 | down |
| AMTN           | -1.4546  | 0.028592 | 0.108141 | down |
| UBE2QL1        | -1.45612 | 2.41E-06 | 8.58E-05 | down |
| LOC386758      | -1.45864 | 2.70E-06 | 9.32E-05 | down |
| GABARAPL1      | -1.46048 | 2.81E-08 | 4.22E-06 | down |
| ACSM2B         | -1.46197 | 0.000125 | 0.001664 | down |
| DPT            | -1.46318 | 0.000115 | 0.001567 | down |
| LOC100288273   | -1.46345 | 0.003078 | 0.019718 | down |
| DUX4L9         | -1.4653  | 1.19E-06 | 5.22E-05 | down |
| C3             | -1.46602 | 0.000255 | 0.002833 | down |
| LOC285095      | -1.46742 | 1.01E-05 | 0.000245 | down |
| C11orf85       | -1.46982 | 0.000319 | 0.003383 | down |
| TF             | -1.47234 | 2.08E-05 | 0.000423 | down |
| C13orf15       | -1.47416 | 7.90E-08 | 8.22E-06 | down |
| TAC4           | -1.47485 | 4.34E-06 | 0.000133 | down |
| BEX4           | -1.47841 | 9.46E-09 | 2.25E-06 | down |
| XLOC_000572    | -1.48027 | 4.67E-06 | 0.00014  | down |
| KLK11          | -1.48146 | 0.000122 | 0.001637 | down |
| SLC4A8         | -1.4836  | 5.88E-05 | 0.000929 | down |
| LDOC1          | -1.48558 | 2.14E-07 | 1.61E-05 | down |
| ITM2A          | -1.4864  | 1.15E-07 | 1.05E-05 | down |
| SLC13A3        | -1.48944 | 1.93E-05 | 0.0004   | down |
| LOC100132593   | -1.48958 | 2.49E-05 | 0.000483 | down |
| LOC388588      | -1.4899  | 2.34E-06 | 8.42E-05 | down |
| LOC100505853   | -1.49067 | 5.81E-05 | 0.000921 | down |
| ARHGAP24       | -1.49235 | 5.53E-07 | 3.04E-05 | down |
| XLOC_000555    | -1.49256 | 6.19E-05 | 0.000965 | down |
| CCKAR          | -1.4955  | 1.85E-05 | 0.000387 | down |
| RASSF2         | -1.49878 | 5.63E-06 | 0.00016  | down |
| SYNDIG1        | -1.49907 | 0.000204 | 0.002377 | down |
| NLRP14         | -1.50106 | 2.14E-05 | 0.000431 | down |
| XLOC_005851    | -1.50231 | 2.15E-06 | 7.84E-05 | down |
| XLOC_007832    | -1.50419 | 3.52E-06 | 0.000114 | down |
| RAP1GAP        | -1.50454 | 6.80E-08 | 7.41E-06 | down |
| XLOC_12_008008 | -1.50585 | 4.71E-05 | 0.000787 | down |
| CHODL          | -1.50647 | 4.40E-07 | 2.60E-05 | down |
| FAM178B        | -1.50652 | 1.21E-05 | 0.000282 | down |
| OR12D2         | -1.50678 | 3.50E-05 | 0.000625 | down |
| XLOC_12_011426 | -1.50696 | 3.68E-05 | 0.000647 | down |

---

---

|              |          |          |          |      |
|--------------|----------|----------|----------|------|
| XLOC_001263  | -1.5074  | 8.90E-06 | 0.000223 | down |
| C16orf89     | -1.50889 | 0.000615 | 0.00561  | down |
| SCTR         | -1.51712 | 1.28E-05 | 0.000295 | down |
| COL4A4       | -1.51733 | 7.39E-07 | 3.69E-05 | down |
| SERPING1     | -1.51786 | 4.20E-06 | 0.00013  | down |
| APC2         | -1.51848 | 3.96E-05 | 0.000686 | down |
| XLOC_003156  | -1.51865 | 4.32E-05 | 0.000732 | down |
| PAIP2B       | -1.5227  | 2.80E-08 | 4.22E-06 | down |
| ERO1LB       | -1.5255  | 0.000211 | 0.002443 | down |
| PDGFD        | -1.52803 | 1.87E-06 | 7.27E-05 | down |
| GADD45B      | -1.52991 | 3.97E-10 | 5.06E-07 | down |
| MYBPC3       | -1.53391 | 1.79E-07 | 1.43E-05 | down |
| DUOX2        | -1.5356  | 0.000213 | 0.002453 | down |
| FCRL3        | -1.54156 | 0.000474 | 0.004568 | down |
| LOC645202    | -1.54183 | 2.20E-05 | 0.000441 | down |
| SCNN1B       | -1.54559 | 0.00487  | 0.028062 | down |
| XLOC_007604  | -1.54658 | 2.13E-05 | 0.00043  | down |
| EFHA2        | -1.547   | 1.47E-05 | 0.000328 | down |
| CECR7        | -1.55056 | 1.74E-06 | 6.96E-05 | down |
| AR           | -1.55128 | 4.73E-07 | 2.75E-05 | down |
| GGT7         | -1.55189 | 2.12E-06 | 7.78E-05 | down |
| LOC100506948 | -1.55245 | 1.46E-08 | 2.87E-06 | down |
| GSTT2        | -1.55346 | 2.83E-06 | 9.61E-05 | down |
| C22orf45     | -1.55367 | 1.48E-05 | 0.000329 | down |
| KRTAP2-1     | -1.55813 | 6.04E-06 | 0.000168 | down |
| C3orf18      | -1.5623  | 4.32E-07 | 2.58E-05 | down |
| LOC100507554 | -1.56349 | 1.31E-05 | 0.0003   | down |
| ADAMTS2      | -1.56416 | 3.85E-06 | 0.000121 | down |
| STK32B       | -1.56826 | 4.88E-06 | 0.000145 | down |
| MORN3        | -1.56941 | 4.14E-06 | 0.000129 | down |
| PRR21        | -1.57017 | 5.81E-06 | 0.000163 | down |
| PNOC         | -1.57055 | 0.000396 | 0.003985 | down |
| OR7A17       | -1.57082 | 6.60E-06 | 0.000179 | down |
| XLOC_004607  | -1.57666 | 0.000175 | 0.002123 | down |
| CELA3A       | -1.57734 | 0.008968 | 0.045029 | down |
| LINGO4       | -1.57749 | 5.28E-07 | 2.96E-05 | down |
| XLOC_013301  | -1.5787  | 4.38E-05 | 0.00074  | down |
| ZNF662       | -1.57921 | 2.37E-05 | 0.000465 | down |
| CDK14        | -1.57975 | 7.63E-09 | 1.99E-06 | down |
| XLOC_005514  | -1.58055 | 4.98E-05 | 0.00082  | down |
| GABRG2       | -1.58055 | 8.15E-06 | 0.000209 | down |
| SCNN1G       | -1.58077 | 0.001444 | 0.01093  | down |
| XLOC_001990  | -1.58184 | 0.000937 | 0.007818 | down |
| KCNE4        | -1.58283 | 4.55E-05 | 0.000763 | down |

---

---

|                |          |          |          |      |
|----------------|----------|----------|----------|------|
| SOSTDC1        | -1.58379 | 2.44E-05 | 0.000475 | down |
| EVL            | -1.58387 | 6.42E-13 | 6.86E-09 | down |
| XLOC_l2_000356 | -1.58449 | 2.22E-05 | 0.000443 | down |
| PTPN13         | -1.58587 | 8.13E-09 | 2.03E-06 | down |
| PADI3          | -1.59189 | 6.28E-06 | 0.000173 | down |
| EYA2           | -1.59212 | 1.94E-05 | 0.000402 | down |
| LOC100131864   | -1.59334 | 1.06E-05 | 0.000255 | down |
| LOC100505754   | -1.5936  | 2.90E-06 | 9.85E-05 | down |
| C16orf47       | -1.5942  | 8.19E-06 | 0.000209 | down |
| LOC100507417   | -1.59466 | 1.43E-05 | 0.000321 | down |
| FUT1           | -1.59521 | 1.19E-06 | 5.20E-05 | down |
| KCNJ18         | -1.5962  | 1.46E-05 | 0.000327 | down |
| BEND5          | -1.6001  | 2.90E-07 | 1.94E-05 | down |
| RPP30          | -1.60024 | 6.91E-07 | 3.55E-05 | down |
| XLOC_001755    | -1.60473 | 1.80E-05 | 0.00038  | down |
| SOX21          | -1.60696 | 0.00059  | 0.005424 | down |
| ANKRD65        | -1.60783 | 1.46E-07 | 1.24E-05 | down |
| LMAN1L         | -1.61189 | 1.33E-06 | 5.65E-05 | down |
| IRF4           | -1.61195 | 0.000255 | 0.002834 | down |
| SYTL3          | -1.61363 | 1.43E-11 | 5.75E-08 | down |
| ANGPTL3        | -1.61435 | 8.33E-07 | 4.02E-05 | down |
| LOC255167      | -1.6159  | 1.07E-06 | 4.84E-05 | down |
| LOC393078      | -1.61618 | 1.18E-05 | 0.000278 | down |
| IGLL5          | -1.61693 | 7.46E-06 | 0.000196 | down |
| SERPINI1       | -1.61789 | 2.57E-06 | 8.99E-05 | down |
| SNORA5B        | -1.61799 | 0.000177 | 0.002144 | down |
| LOC100289134   | -1.62482 | 2.60E-06 | 9.06E-05 | down |
| MUC21          | -1.62759 | 3.62E-06 | 0.000116 | down |
| EPHB6          | -1.62872 | 1.34E-05 | 0.000306 | down |
| CHRNE          | -1.63257 | 8.75E-07 | 4.17E-05 | down |
| RIMS4          | -1.63825 | 4.64E-06 | 0.000139 | down |
| PCDH7          | -1.64122 | 3.79E-05 | 0.000663 | down |
| XLOC_000709    | -1.6444  | 4.74E-05 | 0.000789 | down |
| C8orf12        | -1.64606 | 1.05E-05 | 0.000253 | down |
| EIF5A2         | -1.64743 | 3.07E-07 | 2.01E-05 | down |
| KCNJ12         | -1.64747 | 3.03E-05 | 0.000563 | down |
| NPR3           | -1.64929 | 1.75E-06 | 6.97E-05 | down |
| LOC642648      | -1.65077 | 2.76E-06 | 9.44E-05 | down |
| XLOC_003719    | -1.65178 | 3.44E-05 | 0.000618 | down |
| CELA2A         | -1.65625 | 0.000681 | 0.006091 | down |
| XYLT2          | -1.65675 | 4.18E-08 | 5.51E-06 | down |
| TMEM211        | -1.65719 | 6.09E-06 | 0.000169 | down |
| PDIA2          | -1.65795 | 0.000234 | 0.00265  | down |
| NEAT1          | -1.65884 | 6.84E-06 | 0.000184 | down |

---

---

|                |          |          |          |      |
|----------------|----------|----------|----------|------|
| TNFRSF17       | -1.66028 | 0.000573 | 0.005297 | down |
| GLUL           | -1.66244 | 4.36E-08 | 5.66E-06 | down |
| XLOC_010471    | -1.66746 | 4.37E-05 | 0.00074  | down |
| FMO2           | -1.67256 | 1.64E-08 | 2.99E-06 | down |
| CHRM3          | -1.67272 | 6.92E-06 | 0.000185 | down |
| NLRP7          | -1.67852 | 0.00109  | 0.008774 | down |
| GPR98          | -1.68001 | 5.32E-07 | 2.98E-05 | down |
| HOMER2         | -1.68534 | 1.86E-07 | 1.46E-05 | down |
| MUM1L1         | -1.69323 | 1.85E-05 | 0.000387 | down |
| GPR97          | -1.69639 | 4.41E-07 | 2.60E-05 | down |
| XLOC_001982    | -1.69646 | 8.81E-07 | 4.19E-05 | down |
| BEX1           | -1.69887 | 0.000185 | 0.002221 | down |
| CCNJL          | -1.70189 | 5.54E-06 | 0.000158 | down |
| MST1P9         | -1.7023  | 2.10E-05 | 0.000426 | down |
| P2RY4          | -1.70374 | 9.58E-06 | 0.000236 | down |
| LOC100506090   | -1.70426 | 2.54E-06 | 8.92E-05 | down |
| TCN1           | -1.70459 | 0.000483 | 0.004639 | down |
| XLOC_012007    | -1.70585 | 3.82E-06 | 0.000121 | down |
| LOC100506983   | -1.70727 | 4.63E-07 | 2.71E-05 | down |
| CHST11         | -1.70732 | 4.18E-09 | 1.46E-06 | down |
| EFEMP1         | -1.70747 | 6.96E-09 | 1.92E-06 | down |
| XLOC_12_012552 | -1.70838 | 6.90E-06 | 0.000185 | down |
| SNRPN          | -1.70947 | 9.27E-11 | 2.29E-07 | down |
| RGN            | -1.71336 | 1.21E-05 | 0.000282 | down |
| C5             | -1.71498 | 1.00E-08 | 2.29E-06 | down |
| NAT8L          | -1.71508 | 7.39E-07 | 3.69E-05 | down |
| ENOX1          | -1.71741 | 3.19E-07 | 2.06E-05 | down |
| PHYHD1         | -1.71746 | 2.26E-07 | 1.65E-05 | down |
| XLOC_002647    | -1.71836 | 9.06E-07 | 4.30E-05 | down |
| XLOC_12_006027 | -1.71964 | 1.33E-05 | 0.000304 | down |
| EGFEM1P        | -1.72089 | 4.00E-06 | 0.000125 | down |
| XLOC_001365    | -1.72566 | 3.34E-05 | 0.000606 | down |
| ASXL3          | -1.72568 | 9.35E-07 | 4.37E-05 | down |
| C10orf129      | -1.73267 | 0.000104 | 0.001439 | down |
| CYFIP2         | -1.73295 | 6.15E-09 | 1.78E-06 | down |
| CBS            | -1.73804 | 7.87E-07 | 3.87E-05 | down |
| LOC100128714   | -1.73956 | 3.68E-06 | 0.000117 | down |
| CXCL13         | -1.74012 | 0.002366 | 0.016082 | down |
| ZNF783         | -1.74513 | 2.09E-05 | 0.000425 | down |
| TPD52L1        | -1.74572 | 3.86E-06 | 0.000122 | down |
| TTC7B          | -1.74667 | 6.21E-08 | 6.94E-06 | down |
| XLOC_007374    | -1.7499  | 1.52E-06 | 6.22E-05 | down |
| LOC100505920   | -1.75021 | 8.91E-06 | 0.000223 | down |
| CARNS1         | -1.75132 | 7.45E-05 | 0.001115 | down |

---

---

|                |          |          |          |      |
|----------------|----------|----------|----------|------|
| KANK4          | -1.76046 | 1.09E-05 | 0.000261 | down |
| XLOC_008013    | -1.76084 | 6.98E-06 | 0.000186 | down |
| REC8           | -1.77077 | 3.84E-06 | 0.000121 | down |
| LARP6          | -1.77367 | 2.21E-07 | 1.62E-05 | down |
| CHST3          | -1.77713 | 1.71E-05 | 0.000368 | down |
| LOC100653210   | -1.77995 | 2.59E-05 | 0.0005   | down |
| SNURF          | -1.78036 | 1.91E-10 | 2.88E-07 | down |
| PCDHA7         | -1.7809  | 0.00011  | 0.001505 | down |
| PPP2R3A        | -1.78135 | 7.94E-08 | 8.22E-06 | down |
| XLOC_011486    | -1.78596 | 1.99E-05 | 0.000408 | down |
| APLP1          | -1.78907 | 2.74E-07 | 1.87E-05 | down |
| XLOC_013195    | -1.79    | 0.000102 | 0.001425 | down |
| FIGN           | -1.79694 | 8.56E-11 | 2.29E-07 | down |
| OR2A25         | -1.80324 | 6.63E-05 | 0.001019 | down |
| CXCL17         | -1.80673 | 1.89E-07 | 1.48E-05 | down |
| FAM150B        | -1.80968 | 6.86E-05 | 0.001045 | down |
| XLOC_012786    | -1.81285 | 4.06E-07 | 2.45E-05 | down |
| HOXC4          | -1.81308 | 1.55E-09 | 1.04E-06 | down |
| HBZ            | -1.81653 | 7.09E-06 | 0.000188 | down |
| RNLS           | -1.81805 | 8.33E-07 | 4.02E-05 | down |
| PTPLA          | -1.82197 | 1.42E-05 | 0.000318 | down |
| XLOC_005201    | -1.82833 | 4.90E-06 | 0.000146 | down |
| SNAI3          | -1.82963 | 2.01E-09 | 1.17E-06 | down |
| BNIP3          | -1.83049 | 4.76E-08 | 6.01E-06 | down |
| KCTD8          | -1.83084 | 3.66E-06 | 0.000117 | down |
| XLOC_010356    | -1.83222 | 4.22E-05 | 0.000719 | down |
| LTF            | -1.8328  | 0.00226  | 0.015522 | down |
| BVES           | -1.83686 | 5.03E-07 | 2.88E-05 | down |
| LINC00317      | -1.83722 | 5.26E-07 | 2.95E-05 | down |
| C14orf37       | -1.83914 | 1.23E-06 | 5.32E-05 | down |
| RNF217         | -1.83978 | 3.33E-08 | 4.75E-06 | down |
| GRIA3          | -1.84064 | 1.39E-05 | 0.000313 | down |
| MAL            | -1.84311 | 0.000442 | 0.004336 | down |
| XLOC_l2_010759 | -1.8449  | 2.80E-07 | 1.89E-05 | down |
| XLOC_003695    | -1.84677 | 9.65E-07 | 4.46E-05 | down |
| SYNGR1         | -1.85112 | 1.47E-09 | 1.02E-06 | down |
| XLOC_001952    | -1.85324 | 1.02E-06 | 4.66E-05 | down |
| IRX3           | -1.85413 | 2.17E-07 | 1.62E-05 | down |
| OR10G4         | -1.85924 | 1.19E-05 | 0.000278 | down |
| KIAA0125       | -1.85951 | 2.21E-05 | 0.000441 | down |
| PAR-SN         | -1.86381 | 1.46E-09 | 1.02E-06 | down |
| DUOX1          | -1.86814 | 7.72E-08 | 8.06E-06 | down |
| XLOC_011849    | -1.86887 | 1.16E-06 | 5.10E-05 | down |
| ECHDC3         | -1.8696  | 7.84E-09 | 2.02E-06 | down |

---



---

|                |          |          |          |      |
|----------------|----------|----------|----------|------|
| FAM124B        | -1.87449 | 3.90E-06 | 0.000123 | down |
| XLOC_012005    | -1.8768  | 2.38E-07 | 1.71E-05 | down |
| RXFP4          | -1.87704 | 6.12E-05 | 0.000957 | down |
| LOC100506965   | -1.87781 | 1.51E-08 | 2.88E-06 | down |
| XLOC_12_003401 | -1.88037 | 1.41E-06 | 5.90E-05 | down |
| ZNF793         | -1.8857  | 1.01E-08 | 2.29E-06 | down |
| HYMAI          | -1.88864 | 2.52E-07 | 1.77E-05 | down |
| ODF3           | -1.89242 | 6.41E-07 | 3.40E-05 | down |
| LOC648691      | -1.89384 | 4.22E-06 | 0.000131 | down |
| XLOC_002094    | -1.89688 | 5.88E-07 | 3.16E-05 | down |
| RANBP3L        | -1.89794 | 6.29E-06 | 0.000173 | down |
| XLOC_011754    | -1.89993 | 1.78E-06 | 7.02E-05 | down |
| XLOC_013005    | -1.90298 | 1.88E-06 | 7.28E-05 | down |
| LEPR           | -1.9121  | 1.04E-05 | 0.000251 | down |
| XLOC_003123    | -1.91211 | 2.72E-06 | 9.32E-05 | down |
| XLOC_004446    | -1.91228 | 2.05E-06 | 7.64E-05 | down |
| C8orf71        | -1.91518 | 5.15E-06 | 0.000151 | down |
| CD3E           | -1.9198  | 2.08E-09 | 1.17E-06 | down |
| LOC100128893   | -1.92469 | 2.38E-08 | 3.76E-06 | down |
| FLJ42875       | -1.92882 | 1.57E-08 | 2.93E-06 | down |
| FAM165B        | -1.93037 | 2.20E-07 | 1.62E-05 | down |
| NPY            | -1.93109 | 2.22E-07 | 1.62E-05 | down |
| LOC100506342   | -1.9325  | 1.88E-07 | 1.47E-05 | down |
| SLC6A2         | -1.93517 | 3.21E-06 | 0.000107 | down |
| ADH7           | -1.93669 | 0.000235 | 0.002658 | down |
| XLOC_009343    | -1.93834 | 4.43E-06 | 0.000135 | down |
| CR2            | -1.94153 | 0.000956 | 0.007935 | down |
| LOC100507372   | -1.95082 | 2.41E-08 | 3.79E-06 | down |
| SLC2A4         | -1.95711 | 8.90E-06 | 0.000223 | down |
| AKNAD1         | -1.96016 | 1.26E-06 | 5.40E-05 | down |
| FAM167A        | -1.96148 | 2.81E-06 | 9.56E-05 | down |
| FCRL1          | -1.97352 | 3.81E-05 | 0.000665 | down |
| SPINK2         | -1.97379 | 2.12E-05 | 0.000429 | down |
| FSD2           | -1.98141 | 8.43E-07 | 4.06E-05 | down |
| ANKRD24        | -1.98221 | 5.74E-06 | 0.000162 | down |
| SMARCD3        | -1.98478 | 9.75E-09 | 2.27E-06 | down |
| AQP4           | -1.9857  | 1.55E-07 | 1.29E-05 | down |
| KCNIP3         | -1.9865  | 2.99E-06 | 0.0001   | down |
| ERP27          | -1.98753 | 1.96E-05 | 0.000404 | down |
| ACADL          | -1.98997 | 1.73E-08 | 3.09E-06 | down |
| CHAD           | -1.99083 | 4.09E-06 | 0.000128 | down |
| ADHFE1         | -1.99249 | 2.92E-08 | 4.29E-06 | down |
| XLOC_011535    | -1.9969  | 6.60E-07 | 3.44E-05 | down |
| XLOC_005371    | -1.99708 | 2.99E-06 | 0.0001   | down |

---

---

|                |          |          |          |      |
|----------------|----------|----------|----------|------|
| LOC283856      | -2.0013  | 1.55E-06 | 6.31E-05 | down |
| WASF3          | -2.00822 | 5.08E-08 | 6.31E-06 | down |
| PLCL1          | -2.00999 | 2.12E-09 | 1.17E-06 | down |
| CD19           | -2.01014 | 0.000116 | 0.001573 | down |
| XLOC_003483    | -2.01063 | 1.95E-06 | 7.40E-05 | down |
| FAM151A        | -2.01426 | 2.06E-06 | 7.65E-05 | down |
| XLOC_013925    | -2.01839 | 1.59E-07 | 1.31E-05 | down |
| XLOC_003160    | -2.03069 | 2.94E-06 | 9.92E-05 | down |
| OR51H1         | -2.03205 | 2.69E-06 | 9.31E-05 | down |
| LOC654342      | -2.03675 | 6.76E-07 | 3.50E-05 | down |
| SPINK13        | -2.0378  | 0.000268 | 0.002936 | down |
| LOC400043      | -2.03801 | 1.16E-09 | 8.87E-07 | down |
| ST3GAL1        | -2.03891 | 6.65E-10 | 7.09E-07 | down |
| BTN1A1         | -2.04041 | 4.82E-05 | 0.0008   | down |
| CGNL1          | -2.04451 | 6.16E-08 | 6.91E-06 | down |
| GPER           | -2.05026 | 5.23E-07 | 2.95E-05 | down |
| GBGT1          | -2.05242 | 1.78E-09 | 1.13E-06 | down |
| XLOC_000247    | -2.059   | 2.28E-06 | 8.23E-05 | down |
| ERBB4          | -2.06179 | 1.87E-06 | 7.27E-05 | down |
| POPDC3         | -2.08104 | 7.20E-08 | 7.68E-06 | down |
| OR3A3          | -2.08313 | 4.44E-06 | 0.000135 | down |
| FBXL13         | -2.08379 | 1.07E-06 | 4.82E-05 | down |
| XLOC_012829    | -2.10246 | 3.51E-08 | 4.94E-06 | down |
| XLOC_010769    | -2.10797 | 1.24E-06 | 5.37E-05 | down |
| XLOC_003296    | -2.11924 | 1.29E-05 | 0.000297 | down |
| LIFR           | -2.12481 | 2.95E-09 | 1.26E-06 | down |
| XLOC_009144    | -2.1324  | 1.93E-06 | 7.37E-05 | down |
| RBPJL          | -2.13688 | 1.42E-07 | 1.21E-05 | down |
| XLOC_008945    | -2.13795 | 2.17E-05 | 0.000436 | down |
| XLOC_012662    | -2.14028 | 8.26E-08 | 8.36E-06 | down |
| PALM3          | -2.14396 | 2.15E-08 | 3.55E-06 | down |
| SLC1A2         | -2.14623 | 1.44E-08 | 2.86E-06 | down |
| FOLR1          | -2.14887 | 5.40E-06 | 0.000156 | down |
| PLCXD3         | -2.16334 | 7.09E-07 | 3.60E-05 | down |
| GALNT14        | -2.17343 | 2.03E-06 | 7.59E-05 | down |
| XLOC_l2_015752 | -2.17437 | 2.05E-07 | 1.57E-05 | down |
| TCEAL2         | -2.17818 | 1.81E-07 | 1.44E-05 | down |
| TMED6          | -2.17913 | 3.93E-05 | 0.00068  | down |
| XLOC_012670    | -2.18168 | 4.00E-06 | 0.000125 | down |
| XLOC_006529    | -2.18198 | 5.96E-07 | 3.20E-05 | down |
| BEX2           | -2.18397 | 1.19E-08 | 2.50E-06 | down |
| SCUBE2         | -2.19185 | 2.54E-07 | 1.78E-05 | down |
| LAMA2          | -2.19303 | 9.56E-10 | 8.23E-07 | down |
| ESRRG          | -2.20072 | 1.71E-08 | 3.08E-06 | down |

---

---

|                |          |          |          |      |
|----------------|----------|----------|----------|------|
| NPHS1          | -2.20098 | 3.69E-08 | 5.03E-06 | down |
| PCDH9          | -2.20681 | 1.29E-07 | 1.13E-05 | down |
| MAST4          | -2.21412 | 2.29E-06 | 8.26E-05 | down |
| CACNA2D3       | -2.22547 | 3.92E-09 | 1.43E-06 | down |
| XLOC_010500    | -2.22736 | 1.22E-08 | 2.53E-06 | down |
| LYPD2          | -2.23017 | 3.41E-06 | 0.000111 | down |
| XLOC_012893    | -2.23486 | 5.14E-06 | 0.00015  | down |
| ORM1           | -2.23579 | 5.08E-07 | 2.90E-05 | down |
| PTPRZ1         | -2.24153 | 4.23E-08 | 5.56E-06 | down |
| LOC100128501   | -2.24273 | 4.98E-07 | 2.86E-05 | down |
| FAM20A         | -2.24515 | 9.66E-09 | 2.26E-06 | down |
| GAMT           | -2.24613 | 3.84E-09 | 1.43E-06 | down |
| RDH12          | -2.24868 | 1.71E-06 | 6.86E-05 | down |
| SLC16A7        | -2.24935 | 3.97E-08 | 5.35E-06 | down |
| GNMT           | -2.25286 | 2.28E-08 | 3.64E-06 | down |
| XLOC_001485    | -2.2609  | 7.11E-06 | 0.000189 | down |
| SERPINA4       | -2.26143 | 5.99E-08 | 6.91E-06 | down |
| LRRC17         | -2.26188 | 4.26E-06 | 0.000131 | down |
| PDE1B          | -2.26275 | 3.75E-07 | 2.31E-05 | down |
| KLHDC8A        | -2.26419 | 7.53E-08 | 7.90E-06 | down |
| ROBO3          | -2.26651 | 2.22E-07 | 1.62E-05 | down |
| ZMIZ1          | -2.27217 | 1.32E-08 | 2.67E-06 | down |
| LOC100507656   | -2.27965 | 1.30E-06 | 5.56E-05 | down |
| BLK            | -2.28355 | 2.24E-09 | 1.17E-06 | down |
| MRGPRX3        | -2.30032 | 3.85E-08 | 5.24E-06 | down |
| SLC26A7        | -2.30701 | 1.21E-06 | 5.24E-05 | down |
| LOC100240734   | -2.30729 | 3.54E-09 | 1.37E-06 | down |
| SLCO1A2        | -2.30862 | 5.95E-06 | 0.000166 | down |
| THSD4          | -2.31563 | 4.41E-08 | 5.70E-06 | down |
| LOC283731      | -2.33037 | 7.85E-07 | 3.86E-05 | down |
| RPRM           | -2.33445 | 3.85E-07 | 2.34E-05 | down |
| XLOC_005429    | -2.33451 | 8.68E-08 | 8.65E-06 | down |
| GUCA1C         | -2.34054 | 1.20E-07 | 1.08E-05 | down |
| XLOC_l2_010461 | -2.34235 | 7.03E-07 | 3.59E-05 | down |
| MYRIP          | -2.34562 | 1.84E-09 | 1.13E-06 | down |
| SLC2A12        | -2.34855 | 1.83E-05 | 0.000385 | down |
| PGCP1          | -2.36135 | 2.79E-06 | 9.51E-05 | down |
| GNRH2          | -2.36239 | 1.83E-06 | 7.18E-05 | down |
| LOC100506452   | -2.36253 | 2.05E-09 | 1.17E-06 | down |
| ZNF385B        | -2.3652  | 2.05E-08 | 3.49E-06 | down |
| WDR86          | -2.38077 | 6.99E-07 | 3.57E-05 | down |
| LOC100132790   | -2.38607 | 2.73E-07 | 1.87E-05 | down |
| DIRC3          | -2.39805 | 3.34E-06 | 0.00011  | down |
| TRIM50         | -2.40157 | 1.96E-07 | 1.52E-05 | down |

---

---

|                |          |          |          |      |
|----------------|----------|----------|----------|------|
| XLOC_012240    | -2.40245 | 1.98E-06 | 7.45E-05 | down |
| ORM2           | -2.4069  | 1.08E-07 | 9.99E-06 | down |
| SERPINA5       | -2.41195 | 9.90E-06 | 0.000242 | down |
| CKB            | -2.41446 | 2.16E-06 | 7.86E-05 | down |
| SNORA80        | -2.41531 | 2.41E-06 | 8.58E-05 | down |
| CWH43          | -2.41687 | 1.82E-05 | 0.000383 | down |
| XLOC_004726    | -2.44552 | 2.38E-07 | 1.71E-05 | down |
| GPR133         | -2.44557 | 2.52E-08 | 3.90E-06 | down |
| PACSIN1        | -2.44767 | 2.37E-07 | 1.71E-05 | down |
| ENPP5          | -2.45058 | 3.63E-08 | 5.03E-06 | down |
| LINGO2         | -2.45089 | 2.18E-08 | 3.56E-06 | down |
| LOC400464      | -2.47154 | 1.63E-07 | 1.33E-05 | down |
| PSAPL1         | -2.47295 | 2.77E-05 | 0.000527 | down |
| OR52K2         | -2.47433 | 3.42E-07 | 2.17E-05 | down |
| EGFL6          | -2.48808 | 3.67E-08 | 5.03E-06 | down |
| GSTA3          | -2.48931 | 3.19E-05 | 0.000585 | down |
| PGC            | -2.49946 | 1.66E-05 | 0.00036  | down |
| XLOC_002302    | -2.51048 | 6.81E-08 | 7.41E-06 | down |
| C4orf7         | -2.51202 | 0.001368 | 0.010493 | down |
| EGFR           | -2.51951 | 9.89E-07 | 4.53E-05 | down |
| FGA            | -2.52353 | 1.42E-06 | 5.91E-05 | down |
| PP7080         | -2.52571 | 3.66E-08 | 5.03E-06 | down |
| XLOC_12_001302 | -2.53934 | 9.43E-07 | 4.40E-05 | down |
| HSPB7          | -2.54818 | 4.98E-07 | 2.86E-05 | down |
| PTF1A          | -2.55199 | 4.48E-10 | 5.13E-07 | down |
| XLOC_12_006789 | -2.56501 | 2.82E-09 | 1.26E-06 | down |
| XLOC_003780    | -2.57289 | 1.84E-07 | 1.45E-05 | down |
| KCNJ15         | -2.57747 | 2.36E-09 | 1.17E-06 | down |
| ODZ3           | -2.58324 | 1.09E-07 | 1.00E-05 | down |
| P2RX2          | -2.58909 | 2.40E-07 | 1.71E-05 | down |
| LOC100505601   | -2.59242 | 8.17E-07 | 3.97E-05 | down |
| LRCH3          | -2.59251 | 1.32E-08 | 2.67E-06 | down |
| C8orf84        | -2.59577 | 9.75E-08 | 9.34E-06 | down |
| PTGER3         | -2.59711 | 1.49E-07 | 1.26E-05 | down |
| FXD4           | -2.60608 | 2.64E-05 | 0.000507 | down |
| NME9           | -2.6069  | 1.07E-06 | 4.84E-05 | down |
| XLOC_012210    | -2.61401 | 1.26E-07 | 1.12E-05 | down |
| HS3ST4         | -2.61454 | 5.09E-09 | 1.60E-06 | down |
| CDH2           | -2.66674 | 1.54E-08 | 2.91E-06 | down |
| RBPMS2         | -2.66947 | 1.59E-08 | 2.93E-06 | down |
| XLOC_005180    | -2.67558 | 1.97E-06 | 7.45E-05 | down |
| PAQR5          | -2.67661 | 2.75E-08 | 4.19E-06 | down |
| PDCD6          | -2.7138  | 1.64E-07 | 1.33E-05 | down |
| XLOC_006757    | -2.71834 | 9.03E-08 | 8.96E-06 | down |

---

---

|              |          |          |          |      |
|--------------|----------|----------|----------|------|
| HPN          | -2.74209 | 1.05E-07 | 9.78E-06 | down |
| IGFALS       | -2.74645 | 1.18E-08 | 2.48E-06 | down |
| XLOC_005894  | -2.75771 | 1.74E-07 | 1.39E-05 | down |
| FABP3        | -2.76737 | 7.38E-08 | 7.82E-06 | down |
| XLOC_014216  | -2.7719  | 2.16E-08 | 3.55E-06 | down |
| XLOC_013835  | -2.77232 | 1.49E-08 | 2.88E-06 | down |
| EEF1A2       | -2.77275 | 3.45E-07 | 2.18E-05 | down |
| CSH1         | -2.77481 | 2.28E-07 | 1.66E-05 | down |
| LOC100505974 | -2.83424 | 4.62E-09 | 1.56E-06 | down |
| CLCNKA       | -2.85139 | 1.72E-08 | 3.09E-06 | down |
| G0S2         | -2.85454 | 1.04E-07 | 9.78E-06 | down |
| LOC150622    | -2.85583 | 1.05E-08 | 2.32E-06 | down |
| FGB          | -2.87204 | 1.31E-07 | 1.14E-05 | down |
| RTDR1        | -2.87295 | 3.99E-08 | 5.35E-06 | down |
| XLOC_002010  | -2.90156 | 5.60E-08 | 6.67E-06 | down |
| GREM2        | -2.90289 | 2.08E-06 | 7.69E-05 | down |
| LOC100128131 | -2.90635 | 3.92E-08 | 5.31E-06 | down |
| THOC6        | -2.93886 | 7.07E-07 | 3.59E-05 | down |
| XLOC_009894  | -2.94124 | 2.55E-07 | 1.78E-05 | down |
| C21orf30     | -2.9423  | 6.03E-08 | 6.91E-06 | down |
| FMO6P        | -2.94409 | 5.36E-08 | 6.47E-06 | down |
| ALB          | -2.97474 | 4.62E-06 | 0.000139 | down |
| XLOC_007161  | -2.98599 | 2.20E-07 | 1.62E-05 | down |
| KIF17        | -3.00593 | 7.11E-08 | 7.65E-06 | down |
| GRIA4        | -3.00705 | 3.51E-08 | 4.94E-06 | down |
| SUN5         | -3.02187 | 1.31E-07 | 1.14E-05 | down |
| HDC          | -3.02246 | 5.87E-09 | 1.75E-06 | down |
| IRX2         | -3.03683 | 5.66E-06 | 0.00016  | down |
| DNER         | -3.0489  | 9.86E-08 | 9.36E-06 | down |
| CLEC12B      | -3.07531 | 7.97E-08 | 8.22E-06 | down |
| SLC14A2      | -3.08386 | 9.50E-07 | 4.42E-05 | down |
| XLOC_009075  | -3.0935  | 2.97E-09 | 1.26E-06 | down |
| PLEKHM3      | -3.14845 | 1.72E-07 | 1.38E-05 | down |
| FNDC5        | -3.1505  | 5.08E-08 | 6.31E-06 | down |
| SLC26A9      | -3.15381 | 4.59E-07 | 2.70E-05 | down |
| MFSD4        | -3.15587 | 1.00E-09 | 8.23E-07 | down |
| XLOC_004339  | -3.18061 | 1.04E-08 | 2.31E-06 | down |
| PDILT        | -3.21164 | 6.10E-08 | 6.91E-06 | down |
| KCNK2        | -3.2604  | 9.45E-07 | 4.40E-05 | down |
| TMEM37       | -3.26618 | 2.20E-09 | 1.17E-06 | down |
| XLOC_001575  | -3.29042 | 4.54E-08 | 5.82E-06 | down |
| GHRL         | -3.31449 | 4.38E-06 | 0.000134 | down |
| CLIC6        | -3.33013 | 9.35E-09 | 2.25E-06 | down |
| SH3GL2       | -3.33374 | 8.99E-09 | 2.19E-06 | down |

---

---

|                |          |          |          |      |
|----------------|----------|----------|----------|------|
| XLOC_009183    | -3.34442 | 4.60E-08 | 5.88E-06 | down |
| XLOC_l2_002611 | -3.35175 | 1.13E-08 | 2.42E-06 | down |
| XLOC_l2_013734 | -3.35918 | 5.66E-08 | 6.72E-06 | down |
| PLIN5          | -3.39483 | 1.93E-08 | 3.30E-06 | down |
| COL2A1         | -3.4019  | 5.17E-07 | 2.94E-05 | down |
| XLOC_006599    | -3.44666 | 1.81E-08 | 3.13E-06 | down |
| XLOC_014356    | -3.45823 | 2.47E-07 | 1.74E-05 | down |
| APOBEC2        | -3.54878 | 2.03E-13 | 6.51E-09 | down |
| KCNE2          | -3.58361 | 6.71E-10 | 7.09E-07 | down |
| XLOC_002258    | -3.59105 | 5.71E-08 | 6.72E-06 | down |
| SIGLEC11       | -3.61712 | 8.48E-10 | 7.94E-07 | down |
| PGA3           | -3.66251 | 1.61E-10 | 2.88E-07 | down |
| SULT2A1        | -3.66383 | 1.77E-07 | 1.41E-05 | down |
| CKMT2          | -3.68406 | 5.94E-09 | 1.75E-06 | down |
| UMODL1         | -3.75145 | 2.62E-08 | 4.02E-06 | down |
| B3GAT1         | -3.80679 | 2.07E-08 | 3.50E-06 | down |
| XLOC_004638    | -3.81619 | 1.58E-08 | 2.93E-06 | down |
| CCKBR          | -3.85499 | 6.20E-09 | 1.78E-06 | down |
| XLOC_002997    | -3.91058 | 4.70E-09 | 1.56E-06 | down |
| DRD5           | -3.92081 | 4.80E-09 | 1.57E-06 | down |
| LOC388796      | -3.95479 | 2.98E-08 | 4.37E-06 | down |
| GPR155         | -3.9698  | 1.37E-10 | 2.88E-07 | down |
| KCNJ16         | -3.99564 | 1.91E-08 | 3.27E-06 | down |
| XLOC_010491    | -4.00742 | 1.12E-08 | 2.42E-06 | down |
| PABPC1L2B      | -4.05171 | 2.15E-08 | 3.55E-06 | down |
| LIPF           | -4.08609 | 6.41E-07 | 3.40E-05 | down |
| GDF5           | -4.11104 | 3.03E-09 | 1.26E-06 | down |
| AGXT2L1        | -4.24327 | 9.42E-08 | 9.15E-06 | down |
| FGG            | -4.27097 | 6.93E-08 | 7.48E-06 | down |
| BCL2L11        | -4.3045  | 2.57E-08 | 3.97E-06 | down |
| SSC5D          | -4.37581 | 5.31E-08 | 6.43E-06 | down |
| XLOC_l2_000080 | -4.52382 | 4.85E-09 | 1.57E-06 | down |
| CPA2           | -4.66347 | 2.37E-09 | 1.17E-06 | down |
| CKM            | -4.74148 | 4.33E-08 | 5.66E-06 | down |
| LOC100507464   | -5.02664 | 6.54E-08 | 7.21E-06 | down |
| LOC100506412   | -5.12266 | 3.85E-10 | 5.06E-07 | down |
| SNORA5A        | -5.2152  | 1.23E-07 | 1.10E-05 | down |
| TMEM184A       | -5.33138 | 1.80E-08 | 3.13E-06 | down |
| XLOC_010144    | -5.39546 | 2.52E-08 | 3.90E-06 | down |
| CHIA           | -6.37686 | 3.12E-08 | 4.54E-06 | down |
| GIF            | -7.08042 | 1.34E-11 | 5.75E-08 | down |
| ATP4A          | -7.14004 | 2.06E-10 | 2.88E-07 | down |
| ATP4B          | -7.23622 | 9.28E-11 | 2.29E-07 | down |

---
